# Supplementary material for: tRNA Core Hypothesis for the Transition from the RNA World to the Ribonucleoprotein World
Source: MDPI journal article supplement (doi:10.3390/life6020015), 2016-03-23
Supplement: s1 [file s1]

# Supplementary Materials: tRNA Core Hypothesis for the Transition from the RNA World to the Ribonucleoprotein World

Savio T. de Farias <sup>1,†,\*</sup>, Thais G. Rêgo <sup>2,†</sup> and Marco V. José <sup>3,†,\*</sup>

BLASTX 2.2.27+

Reference: Stephen F. Altschul, Thomas L. Madden, Alejandro A. Schaffer, Jinghui Zhang, Zheng Zhang, Webb Miller, and David J. Lipman (1997), "Gapped BLAST and PSI-BLAST: a new generation of protein database search programs", Nucleic Acids Res. 25:3389-3402.

RID: G67NCMY9013

Database: Non-redundant UniProtKB/SwissProt sequences  
454,086 sequences; 169,309,753 total letters

Query= 1

Length=121

| Score                                       | E |  | (Bits) | Value |
|---------------------------------------------|---|--|--------|-------|
| Sequences producing significant alignments: |   |  |        |       |

|                        |                                            |      |     |
|------------------------|--------------------------------------------|------|-----|
| sp A8ABM5.1 EF1A_IGNH4 | RecName: Full=Elongation factor 1-alpha... | 29.3 | 1.2 |
|------------------------|--------------------------------------------|------|-----|

ALIGNMENTS

>sp|A8ABM5.1|EF1A\_IGNH4 RecName: Full=Elongation factor 1-alpha; Short=EF-1-alpha; AltName: Full=Elongation factor Tu; Short=EF-Tu  
Length=442

Score = 29.3 bits (64), Expect = 1.2, Method: Composition-based stats.  
Identities = 15/38 (39%), Positives = 24/38 (63%), Gaps = 5/38 (13%)  
Frame = -1

|       |     |                                        |     |
|-------|-----|----------------------------------------|-----|
| Query | 103 | SSLAVGFEP-----THSVNSRIFQLQQGVEPVLARVPE | 5   |
|       |     | S++AVG+ P T SV SRI +++Q ++P +V E       |     |
| Sbjct | 341 | SAIAVGYPVIHAHTASVASRIIEIKQKIDPRTGKVIE  | 378 |

Query= 2

Length=136

| Score                                       | E |  | (Bits) | Value |
|---------------------------------------------|---|--|--------|-------|
| Sequences producing significant alignments: |   |  |        |       |

|                        |                                            |      |     |
|------------------------|--------------------------------------------|------|-----|
| sp A8ABM5.1 EF1A_IGNH4 | RecName: Full=Elongation factor 1-alpha... | 28.1 | 3.8 |
|------------------------|--------------------------------------------|------|-----|

|                     |                                        |      |     |
|---------------------|----------------------------------------|------|-----|
| sp Q29293.1 RL3_PIG | RecName: Full=60S ribosomal protein L3 | 26.6 | 8.4 |
|---------------------|----------------------------------------|------|-----|

## ALIGNMENTS

>sp|A8ABM5.1|EF1A\_IGNH4 RecName: Full=Elongation factor 1-alpha; Short=EF-1-alpha; AltName:  
Full=Elongation factor Tu; Short=EF-Tu  
Length=442

Score = 28.1 bits (61), Expect = 3.8, Method: Composition-based stats.  
Identities = 17/44 (39%), Positives = 25/44 (57%), Gaps = 7/44 (16%)  
Frame = -1

```
Query   121   IWYGPAHHFAVGFE-----THSVNSRIFQLQQGVPEVLARVPE   5
          IW+  A    AVG+ P      T SV SRI +++Q ++P   +V E
Sbjct   337   IWHPSA--IAVGYPVIHAHTASVASRIIEIKQKIDPRTGKVIE   378
```

>sp|Q29293.1|RL3\_PIG RecName: Full=60S ribosomal protein L3  
Length=130

Score = 26.6 bits (57), Expect = 8.4, Method: Compositional matrix adjust.  
Identities = 10/19 (53%), Positives = 13/19 (68%), Gaps = 0/19 (0%)  
Frame = +2

```
Query   47   LEDSAVNRMGRFESYGEV   103
          L D ++N +GRF  YGEV
Sbjct   106   LSDKSINPLGRFVHYGEVT   124
```

Query= 3

Length=138

| Sequences producing significant alignments: | Score<br>(Bits) | E<br>Value |
|---------------------------------------------|-----------------|------------|
|---------------------------------------------|-----------------|------------|

|                                                                  |      |     |
|------------------------------------------------------------------|------|-----|
| sp B3PIT8.1 MNMG_CELJU RecName: Full=tRNA uridine 5-carboxyme... | 27.3 | 6.7 |
|------------------------------------------------------------------|------|-----|

>sp|B3PIT8.1|MNMG\_CELJU RecName: Full=tRNA uridine 5-carboxymethylaminomethyl  
modification  
enzyme MnmG; AltName: Full=Glucose-inhibited division  
protein A  
Length=638

Score = 27.3 bits (59), Expect = 6.7, Method: Composition-based stats.  
Identities = 12/20 (60%), Positives = 15/20 (75%), Gaps = 0/20 (0%)  
Frame = +1

```
Query   70   SLKGEPSSGEYACPQVRVES   129
          SLKGEP +GE A  QV +E+
Sbjct   525   SLKGEPLAGEAAAEQVEIEA   544
```

Query= 4

Length=148

| Sequences producing significant alignments:                      | Score<br>(Bits) | E<br>Value |
|------------------------------------------------------------------|-----------------|------------|
| sp B1I165.1 KTHY_DESAP RecName: Full=Thymidylate kinase; AltN... | 27.3            | 4.8        |

#### ALIGNMENTS

>sp|B1I165.1|KTHY\_DESAP RecName: Full=Thymidylate kinase; AltName: Full=dTMP kinase  
Length=221

Score = 27.3 bits (59), Expect = 4.8, Method: Compositional matrix adjust.  
Identities = 12/27 (44%), Positives = 18/27 (67%), Gaps = 0/27 (0%)  
Frame = -3

|       |     |                             |    |
|-------|-----|-----------------------------|----|
| Query | 116 | NSRIFQLQRSGGTQPGPADRRILLNSG | 36 |
|       |     | N R+ + GGT+ G A RR+LL++G    |    |
| Sbjct | 32  | NHRVLVTREPGGTRIGEAVRRVLLDTG | 58 |

Query= 5

Length=138

| Sequences producing significant alignments:                      | Score<br>(Bits) | E<br>Value |
|------------------------------------------------------------------|-----------------|------------|
| sp Q8Y003.1 RGMG_RALSO RecName: Full=Putative ribose/galactos... | 27.7            | 5.0        |

#### ALIGNMENTS

>sp|Q8Y003.1|RGMG\_RALSO RecName: Full=Putative ribose/galactose/methyl galactoside import

ATP-binding protein  
Length=518

Score = 27.7 bits (60), Expect = 5.0, Method: Compositional matrix adjust.  
Identities = 11/28 (39%), Positives = 16/28 (57%), Gaps = 0/28 (0%)  
Frame = -1

|       |     |                              |     |
|-------|-----|------------------------------|-----|
| Query | 120 | PWQVMSELIWVRRDSTRTCGQAYSPELR | 37  |
|       |     | P+ ++E IW+RR+ CG ELR         |     |
| Sbjct | 116 | PYMTVAENIWIRREPRNRCGLVDHAELR | 143 |

Query= 7

Length=131

| Sequences producing significant alignments: | Score<br>(Bits) | E<br>Value |
|---------------------------------------------|-----------------|------------|
|---------------------------------------------|-----------------|------------|

|                                                                  |      |     |
|------------------------------------------------------------------|------|-----|
| sp Q2NQF4.1 DAPF_SODGM RecName: Full=Diaminopimelate epimeras... | 26.6 | 8.4 |
|------------------------------------------------------------------|------|-----|

#### ALIGNMENTS

>sp|Q2NQF4.1|DAPF\_SODGM RecName: Full=Diaminopimelate epimerase; Short=DAP epimerase  
Length=274

Score = 26.6 bits (57), Expect = 8.4, Method: Compositional matrix adjust.  
Identities = 13/31 (42%), Positives = 16/31 (52%), Gaps = 0/31 (0%)  
Frame = -3

|       |     |                                 |    |
|-------|-----|---------------------------------|----|
| Query | 102 | SPPLVRRDSTRTCGQAYSPELRGSNPY*PEF | 10 |
|       |     | SP ++RR S R CG + L PY PE        |    |
| Sbjct | 26  | SPEMIRRLSDRHCGVGFQQLLVVEPPYDPEL | 56 |

Query= 8

Length=133

| Sequences producing significant alignments: | Score<br>(Bits) | E<br>Value |
|---------------------------------------------|-----------------|------------|
|---------------------------------------------|-----------------|------------|

|                                                                  |      |     |
|------------------------------------------------------------------|------|-----|
| sp Q8EDG1.1 CDD_SHEON RecName: Full=Cytidine deaminase; AltNa... | 28.1 | 2.9 |
| sp Q0HHI5.1 CDD_SHESM RecName: Full=Cytidine deaminase; AltNa... | 28.1 | 2.9 |
| sp Q0HTT9.1 CDD_SHESR RecName: Full=Cytidine deaminase; AltNa... | 28.1 | 2.9 |
| sp A0KYD1.1 CDD_SHESA RecName: Full=Cytidine deaminase; AltNa... | 28.1 | 2.9 |
| sp A8H5H1.1 CDD_SHEPA RecName: Full=Cytidine deaminase; AltNa... | 27.7 | 4.4 |

#### ALIGNMENTS

>sp|Q8EDG1.1|CDD\_SHEON RecName: Full=Cytidine deaminase; AltName: Full=Cytidine aminohydrolase;

Short=CDA

Length=296

Score = 28.1 bits (61), Expect = 2.9, Method: Composition-based stats.  
Identities = 14/35 (40%), Positives = 21/35 (60%), Gaps = 0/35 (0%)  
Frame = -3

|       |     |                                     |     |
|-------|-----|-------------------------------------|-----|
| Query | 125 | LQGPSAVRDVILNAERIERPWQVMSELI*GGRTRI | 21  |
|       |     | L G S + D+I+NA Q M+EL+ GG+ +I       |     |
| Sbjct | 112 | LSGESQIVDMIVNASPCGHCRQFMNELVDGGQIKI | 146 |

>sp|Q0HHI5.1|CDD\_SHESM RecName: Full=Cytidine deaminase; AltName: Full=Cytidine aminohydrolase;

Short=CDA

Length=296

Score = 28.1 bits (61), Expect = 2.9, Method: Composition-based stats.  
Identities = 14/35 (40%), Positives = 21/35 (60%), Gaps = 0/35 (0%)

Frame = -3

```
Query 125 LQGPSAVRDVILNAERIERPWQVMSELI*GGRTRI 21
          L G S + D+I+NA          Q M+EL+ GG+ +I
Sbjct 112 LSGESQIVDMIVNASPCGHCRCQFMNELVEGGQIKI 146
```

>sp|Q0HTT9.1|CDD\_SHEsr RecName: Full=Cytidine deaminase; AltName: Full=Cytidine aminohydrolase;

Short=CDA

Length=296

Score = 28.1 bits (61), Expect = 2.9, Method: Composition-based stats.  
Identities = 14/35 (40%), Positives = 21/35 (60%), Gaps = 0/35 (0%)  
Frame = -3

```
Query 125 LQGPSAVRDVILNAERIERPWQVMSELI*GGRTRI 21
          L G S + D+I+NA          Q M+EL+ GG+ +I
Sbjct 112 LSGESQIVDMIVNASPCGHCRCQFMNELVEGGQIKI 146
```

>sp|A0KYD1.1|CDD\_SHEsa RecName: Full=Cytidine deaminase; AltName: Full=Cytidine aminohydrolase;

Short=CDA

Length=296

Score = 28.1 bits (61), Expect = 2.9, Method: Composition-based stats.  
Identities = 14/35 (40%), Positives = 21/35 (60%), Gaps = 0/35 (0%)  
Frame = -3

```
Query 125 LQGPSAVRDVILNAERIERPWQVMSELI*GGRTRI 21
          L G S + D+I+NA          Q M+EL+ GG+ +I
Sbjct 112 LSGESQIVDMIVNASPCGHCRCQFMNELVEGGQIKI 146
```

>sp|A8H5H1.1|CDD\_SHEpa RecName: Full=Cytidine deaminase; AltName: Full=Cytidine aminohydrolase;

Short=CDA

Length=296

Score = 27.7 bits (60), Expect = 4.4, Method: Composition-based stats.  
Identities = 13/35 (37%), Positives = 20/35 (57%), Gaps = 0/35 (0%)  
Frame = -3

```
Query 125 LQGPSAVRDVILNAERIERPWQVMSELI*GGRTRI 21
          L G S + D+I+NA          Q ++EL+ GG+ I
Sbjct 112 LSGESIIEDIIVNASPCGHCRCQFINELVDGGKVNI 146
```

Query= 9

Length=125

|                                             | Score  | E     |
|---------------------------------------------|--------|-------|
| Sequences producing significant alignments: | (Bits) | Value |

|                                                                  |      |     |
|------------------------------------------------------------------|------|-----|
| sp P06221.1 RPOL_BPSP6 RecName: Full=DNA-directed RNA polymerase | 28.1 | 3.7 |
|------------------------------------------------------------------|------|-----|

## ALIGNMENTS

>sp|P06221.1|RPOL\_BPSP6 RecName: Full=DNA-directed RNA polymerase  
Length=874

Score = 28.1 bits (61), Expect = 3.7, Method: Composition-based stats.  
Identities = 14/27 (52%), Positives = 16/27 (59%), Gaps = 0/27 (0%)  
Frame = -2

|       |     |                             |     |
|-------|-----|-----------------------------|-----|
| Query | 115 | SAVQVSSHELQNESNDLGKLCNLSEG  | 35  |
|       |     | S V V S L +SNDLGK L +EG     |     |
| Sbjct | 414 | SRVYVQSSTLSPQSNDLGKALLRFTEG | 440 |

Query= 10

Length=111

|                                             | Score  | E     |
|---------------------------------------------|--------|-------|
| Sequences producing significant alignments: | (Bits) | Value |

|                                                                  |      |     |
|------------------------------------------------------------------|------|-----|
| sp Q8FS33.1 RPOA_COREF RecName: Full=DNA-directed RNA polymer... | 26.9 | 6.2 |
| sp A4QBQ7.1 RPOA_CORGB RecName: Full=DNA-directed RNA polymer... | 26.6 | 8.0 |
| sp Q8NSV2.1 RPOA_CORGL RecName: Full=DNA-directed RNA polymer... | 26.6 | 8.2 |
| sp Q6NJ63.1 RPOA_CORDI RecName: Full=DNA-directed RNA polymer... | 26.6 | 9.0 |

## ALIGNMENTS

>sp|Q8FS33.1|RPOA\_COREF RecName: Full=DNA-directed RNA polymerase subunit alpha;  
Short=RNAP  
subunit alpha; AltName: Full=RNA polymerase subunit alpha;  
AltName: Full=Transcriptase subunit alpha  
Length=338

Score = 26.9 bits (58), Expect = 6.2, Method: Composition-based stats.  
Identities = 12/22 (55%), Positives = 15/22 (68%), Gaps = 0/22 (0%)  
Frame = -3

|       |    |                        |    |
|-------|----|------------------------|----|
| Query | 85 | VRDVILNCRGFVQSSQGVEPVL | 20 |
|       |    | V D+ILN +G V SS EPV+   |    |
| Sbjct | 73 | VSDIILNIKGLVLSSDSDEPVI | 94 |

>sp|A4QBQ7.1|RPOA\_CORGB RecName: Full=DNA-directed RNA polymerase subunit alpha;  
Short=RNAP  
subunit alpha; AltName: Full=RNA polymerase subunit alpha;  
AltName: Full=Transcriptase subunit alpha  
Length=338

Score = 26.6 bits (57), Expect = 8.0, Method: Composition-based stats.  
Identities = 12/25 (48%), Positives = 17/25 (68%), Gaps = 0/25 (0%)  
Frame = -3

Query 85 VRDVILNCRGFVQSSQGVEPVLARV 11  
 V D+ILN +G V SS EPV+ ++  
 Sbjct 73 VSDIILNIKGLVLSSDSDEPVVMQL 97

>sp|Q8NSV2.1|RPOA\_CORGL RecName: Full=DNA-directed RNA polymerase subunit alpha;  
 Short=RNAP  
 subunit alpha; AltName: Full=RNA polymerase subunit alpha;  
 AltName: Full=Transcriptase subunit alpha  
 Length=338

Score = 26.6 bits (57), Expect = 8.2, Method: Composition-based stats.  
 Identities = 12/25 (48%), Positives = 17/25 (68%), Gaps = 0/25 (0%)  
 Frame = -3

Query 85 VRDVILNCRGFVQSSQGVEPVLARV 11  
 V D+ILN +G V SS EPV+ ++  
 Sbjct 73 VSDIILNIKGLVLSSDSDEPVVMQL 97

>sp|Q6NJ63.1|RPOA\_CORDI RecName: Full=DNA-directed RNA polymerase subunit alpha;  
 Short=RNAP  
 subunit alpha; AltName: Full=RNA polymerase subunit alpha;  
 AltName: Full=Transcriptase subunit alpha  
 Length=338

Score = 26.6 bits (57), Expect = 9.0, Method: Composition-based stats.  
 Identities = 12/22 (55%), Positives = 15/22 (68%), Gaps = 0/22 (0%)  
 Frame = -3

Query 85 VRDVILNCRGFVQSSQGVEPVL 20  
 V D+ILN +G V SS EPV+  
 Sbjct 73 VSDIILNIKGLVLSSDSDEPVV 94

Query= 12  
 Length=126

| Sequences producing significant alignments: | Score<br>(Bits) | E<br>Value |
|---------------------------------------------|-----------------|------------|
|---------------------------------------------|-----------------|------------|

|                                                                  |      |     |
|------------------------------------------------------------------|------|-----|
| sp P49327.3 FAS_HUMAN RecName: Full=Fatty acid synthase; Incl... | 28.5 | 2.6 |
|------------------------------------------------------------------|------|-----|

#### ALIGNMENTS

>sp|P49327.3|FAS\_HUMAN RecName: Full=Fatty acid synthase; Includes: RecName:  
 Full=[Acyl-carrier-protein]  
 S-acetyltransferase; Includes: RecName:  
 Full=[Acyl-carrier-protein] S-malonyltransferase; Includes:  
 RecName: Full=3-oxoacyl-[acyl-carrier-protein] synthase; Includes:  
 RecName: Full=3-oxoacyl-[acyl-carrier-protein] reductase;  
 Includes: RecName: Full=3-hydroxyacyl-[acyl-carrier-protein]  
 dehydratase; Includes: RecName: Full=Enoyl-[acyl-carrier-protein]  
 reductase; Includes: RecName: Full=Oleoyl-[acyl-carrier-protein]  
 hydrolase  
 Length=2511

Score = 28.5 bits (62), Expect = 2.6, Method: Compositional matrix adjust.  
 Identities = 12/27 (44%), Positives = 17/27 (63%), Gaps = 0/27 (0%)  
 Frame = -3

Query 124 FTLQGPSAVRDVILNRWLRSIWYGPAH 44  
 +TLQ + V DV+++RWLR G H

Sbjct 1067 YTLQDKAQVADVVSRLRVTVAGGVH 1093

Query= 13

Length=131

|                                             | Score  | E     |
|---------------------------------------------|--------|-------|
| Sequences producing significant alignments: | (Bits) | Value |

|                                                                  |      |     |
|------------------------------------------------------------------|------|-----|
| sp Q03396.1 L_SV5WR RecName: Full=RNA-directed RNA polymerase... | 29.6 | 1.3 |
|------------------------------------------------------------------|------|-----|

#### ALIGNMENTS

>sp|Q03396.1|L\_SV5WR RecName: Full=RNA-directed RNA polymerase L; Short=Protein L;

AltName: Full=Large structural protein; AltName: Full=Replicase;

AltName: Full=Transcriptase; Includes: RecName: Full=RNA-directed

RNA polymerase; Includes: RecName: Full=mRNA (guanine-N(7)-)-methyltransferase;

Includes: RecName: Full=mRNA

guanylyltransferase

Length=2255

Score = 29.6 bits (65), Expect = 1.3, Method: Composition-based stats.

Identities = 15/30 (50%), Positives = 17/30 (57%), Gaps = 3/30 (10%)

Frame = -3

|           |                                 |     |
|-----------|---------------------------------|-----|
| Query 114 | PGPADRRILLN---SDGFDPSGTAQPTTRG  | 34  |
|           | P P +RR+LLN D FDPS Q T G        |     |
| Sbjct 507 | PNPFNRRLLLNLFLGDDKFDPSVELQYVTSG | 536 |

Query= 14

Length=125

|                                             | Score  | E     |
|---------------------------------------------|--------|-------|
| Sequences producing significant alignments: | (Bits) | Value |

|                                                        |      |     |
|--------------------------------------------------------|------|-----|
| sp Q9VQC4.1 GLCTK_DROME RecName: Full=Glycerate kinase | 28.5 | 2.2 |
|--------------------------------------------------------|------|-----|

#### ALIGNMENTS

>sp|Q9VQC4.1|GLCTK\_DROME RecName: Full=Glycerate kinase

Length=487

Score = 28.5 bits (62), Expect = 2.2, Method: Compositional matrix adjust.

Identities = 11/21 (52%), Positives = 15/21 (71%), Gaps = 0/21 (0%)

Frame = -1

|           |                       |     |
|-----------|-----------------------|-----|
| Query 86  | LICSGHSAVQVSSHELGGRT  | 24  |
|           | LIC G ++VS H LGGR++   |     |
| Sbjct 369 | LICGGEPIKVS GHGLGGRSQ | 389 |

Query= 15

Length=148



|                                             | Score<br>(Bits) | E<br>Value |
|---------------------------------------------|-----------------|------------|
| Sequences producing significant alignments: |                 |            |

|                                                                  |      |     |
|------------------------------------------------------------------|------|-----|
| sp Q4QLD1.1 HIS82_HAEI8 RecName: Full=Histidinol-phosphate am... | 27.3 | 6.9 |
|------------------------------------------------------------------|------|-----|

## ALIGNMENTS

```
>sp|Q4QLD1.1|HIS82_HAEI8 RecName: Full=Histidinol-phosphate aminotransferase 2;
AltName:
Full=Imidazole acetol-phosphate transaminase 2
Length=366
```

Score = 27.3 bits (59), Expect = 6.9, Method: Composition-based stats.  
 Identities = 14/39 (36%), Positives = 23/39 (59%), Gaps = 0/39 (0%)  
 Frame = -1

```
Query 133 NPDRLRTGVFS*TQGVEPVLARVPERLAVGFEPTHSVNSR 17
          NP+  TG F  +Q +E  LA+VPE + V  +  ++  +R
Sbjct 163 NPNNPTGNFLTSQEIEDFLAKVPENVIVVLDEAYTEFTR 201
```

Query= 16

Length=143

|                                             | Score<br>(Bits) | E<br>Value |
|---------------------------------------------|-----------------|------------|
| Sequences producing significant alignments: |                 |            |

|                                                                  |      |     |
|------------------------------------------------------------------|------|-----|
| sp Q30ZW0.1 TPIS_DESDG RecName: Full=Triosephosphate isomeras... | 28.1 | 3.4 |
|------------------------------------------------------------------|------|-----|

## ALIGNMENTS

```
>sp|Q30ZW0.1|TPIS_DESDG RecName: Full=Triosephosphate isomerase; Short=TIM;
AltName:
Full=Triose-phosphate isomerase
Length=250
```

Score = 28.1 bits (61), Expect = 3.4, Method: Composition-based stats.  
 Identities = 13/29 (45%), Positives = 20/29 (69%), Gaps = 1/29 (3%)  
 Frame = -2

```
Query 103 LSEGVEPVLARV-PERLAVGFEPTHSVNS 20
          LSEG+  V A + PERLA+ +EP  ++ +
Sbjct 148 LSEGLSGVPAGIAPERLAIAYEPVWAIGT 176
```

Query= 17

Length=156

|                                             | Score<br>(Bits) | E<br>Value |
|---------------------------------------------|-----------------|------------|
| Sequences producing significant alignments: |                 |            |

|                                                                  |      |     |
|------------------------------------------------------------------|------|-----|
| sp B3PIT8.1 MNMG_CELJU RecName: Full=tRNA uridine 5-carboxyme... | 27.3 | 7.5 |
|------------------------------------------------------------------|------|-----|

## ALIGNMENTS

>sp|B3PIT8.1|MNMG\_CELJU RecName: Full=tRNA uridine 5-carboxymethylaminomethyl modification enzyme MnmG; AltName: Full=Glucose-inhibited division protein A  
Length=638

Score = 27.3 bits (59), Expect = 7.5, Method: Composition-based stats.  
Identities = 12/20 (60%), Positives = 15/20 (75%), Gaps = 0/20 (0%)  
Frame = +1

Query 88 SLKGEPSSGEYACPQVRVES 147  
SLKGEP +GE A QV +E+  
Sbjct 525 SLKGEPLAGEAAAEQVEIEA 544

Query= 18

Length=148

| Sequences producing significant alignments:                      | Score<br>(Bits) | E<br>Value |
|------------------------------------------------------------------|-----------------|------------|
| sp Q1AW66.1 PYRH_RUBXD RecName: Full=Uridylate kinase; Short=... | 27.3            | 5.7        |

## ALIGNMENTS

>sp|Q1AW66.1|PYRH\_RUBXD RecName: Full=Uridylate kinase; Short=UK; AltName: Full=Uridine monophosphate kinase; Short=UMP kinase; Short=UMPK  
Length=255

Score = 27.3 bits (59), Expect = 5.7, Method: Composition-based stats.  
Identities = 15/35 (43%), Positives = 17/35 (49%), Gaps = 0/35 (0%)  
Frame = +3

Query 42 SNPTARVQENTPVRRSGLSPSGPPLRNSG\*YGFDP 146  
S A E P+RR L SG L +G YG DP  
Sbjct 4 SARAAETSELGPLRRVVLKLSGESLAGNGGYGIDP 38

Query= 19

Length=134

| Sequences producing significant alignments:                | Score<br>(Bits) | E<br>Value |
|------------------------------------------------------------|-----------------|------------|
| sp Q29293.1 RL3_PIG RecName: Full=60S ribosomal protein L3 | 26.9            | 4.5        |

## ALIGNMENTS

>sp|Q29293.1|RL3\_PIG RecName: Full=60S ribosomal protein L3  
Length=130

Score = 26.9 bits (58), Expect = 4.5, Method: Compositional matrix adjust.

Identities = 9/23 (39%), Positives = 15/23 (65%), Gaps = 0/23 (0%)  
 Frame = +2

Query 8 LEDSAVNRMGRFESYGESSGEYA 76  
 L D ++N +GRF YGE + ++  
 Sbjct 106 LSDKSINPLGRFVHYGEVTNDFV 128

Query= 20

Length=129

|                                             |                                           |      | Score  | E     |
|---------------------------------------------|-------------------------------------------|------|--------|-------|
| Sequences producing significant alignments: |                                           |      | (Bits) | Value |
| sp Q5GS39.1 GPDA_WOLTR                      | RecName: Full=Glycerol-3-phosphate deh... | 28.1 | 3.4    |       |
| sp P61749.1 GPDA_WOLPM                      | RecName: Full=Glycerol-3-phosphate deh... | 26.9 | 6.5    |       |
| sp C0R3K2.1 GPDA_WOLWR                      | RecName: Full=Glycerol-3-phosphate deh... | 26.9 | 6.6    |       |

#### ALIGNMENTS

>sp|Q5GS39.1|GPDA\_WOLTR RecName: Full=Glycerol-3-phosphate dehydrogenase  
 [NAD(P)+]; AltName:  
 Full=NAD(P)H-dependent glycerol-3-phosphate dehydrogenase  
 Length=327

Score = 28.1 bits (61), Expect = 3.4, Method: Composition-based stats.  
 Identities = 13/35 (37%), Positives = 20/35 (57%), Gaps = 0/35 (0%)  
 Frame = -3

Query 124 TLQGSAVRDVILNCRGFVQSSLAVGFEPTHSVNS 20  
 TL GP+ + D+I+ C +L+ GF+ S NS  
 Sbjct 234 TLLGPACLGDLIMTCTSLNSRNLSFGFKIGSSNNS 268

>sp|P61749.1|GPDA\_WOLPM RecName: Full=Glycerol-3-phosphate dehydrogenase  
 [NAD(P)+]; AltName:  
 Full=NAD(P)H-dependent glycerol-3-phosphate dehydrogenase  
 Length=327

Score = 26.9 bits (58), Expect = 6.5, Method: Composition-based stats.  
 Identities = 12/34 (35%), Positives = 20/34 (59%), Gaps = 0/34 (0%)  
 Frame = -3

Query 124 TLQGSAVRDVILNCRGFVQSSLAVGFEPTHSVN 23  
 TL GP+ + D+I+ C +L+ GF+ +S N  
 Sbjct 234 TLLGPACLGDLIMTCTSLNSRNLSFGFKIGNSDN 267

>sp|C0R3K2.1|GPDA\_WOLWR RecName: Full=Glycerol-3-phosphate dehydrogenase  
 [NAD(P)+]; AltName:  
 Full=NAD(P)H-dependent glycerol-3-phosphate dehydrogenase  
 Length=327

Score = 26.9 bits (58), Expect = 6.6, Method: Composition-based stats.  
 Identities = 12/34 (35%), Positives = 20/34 (59%), Gaps = 0/34 (0%)  
 Frame = -3

Query 124 TLQGSAVRDVILNCRGFVQSSLAVGFEPTHSVN 23  
 TL GP+ + D+I+ C +L+ GF+ +S N  
 Sbjct 234 TLLGPACLGDLIMTCTSLNSRNLSFGFKIGNSDN 267

Query= 21

Length=136

|                                             | Score  | E     |
|---------------------------------------------|--------|-------|
| Sequences producing significant alignments: | (Bits) | Value |

|                                                            |      |     |
|------------------------------------------------------------|------|-----|
| sp Q29293.1 RL3_PIG RecName: Full=60S ribosomal protein L3 | 26.6 | 8.2 |
|------------------------------------------------------------|------|-----|

#### ALIGNMENTS

>sp|Q29293.1|RL3\_PIG RecName: Full=60S ribosomal protein L3  
Length=130

Score = 26.6 bits (57), Expect = 8.2, Method: Compositional matrix adjust.  
Identities  
= 10/19 (53%), Positives = 13/19 (68%), Gaps = 0/19 (0%)  
Frame = +2

```
Query   8      LEDSAVNRMGRFESYGEVV   64
        L D ++N +GRF  YGEV
Sbjct  106  LSDKSINPLGRFVHYGEVT   124
```

Query= 22

Length=144

|                                             | Score  | E     |
|---------------------------------------------|--------|-------|
| Sequences producing significant alignments: | (Bits) | Value |

|                                                                  |      |     |
|------------------------------------------------------------------|------|-----|
| sp P49327.3 FAS_HUMAN RecName: Full=Fatty acid synthase; Incl... | 28.9 | 2.4 |
|------------------------------------------------------------------|------|-----|

#### ALIGNMENTS

>sp|P49327.3|FAS\_HUMAN RecName: Full=Fatty acid synthase; Includes: RecName:  
Full=[Acyl-carrier-protein]  
S-acetyltransferase; Includes: RecName:  
Full=[Acyl-carrier-protein] S-malonyltransferase; Includes:  
RecName: Full=3-oxoacyl-[acyl-carrier-protein] synthase; Includes:  
RecName: Full=3-oxoacyl-[acyl-carrier-protein] reductase;  
Includes: RecName: Full=3-hydroxyacyl-[acyl-carrier-protein]  
dehydratase; Includes: RecName: Full=Enoyl-[acyl-carrier-protein]  
reductase; Includes: RecName: Full=Oleoyl-[acyl-carrier-protein]  
hydrolase  
Length=2511

Score = 28.9 bits (63), Expect = 2.4, Method: Compositional matrix adjust.  
Identities = 12/27 (44%), Positives = 17/27 (63%), Gaps = 0/27 (0%)  
Frame = -3

```
Query  142    FTLQGPSAVRDVILNRWLRSIWYGPAH   62
        +TLQ + V DV+++RWLR      G  H
Sbjct  1067  YTLQDKAQVADVVSRLRVTVAGGVH   1093
```

Query= 23

Length=149

| Sequences producing significant alignments: | Score<br>(Bits) | E<br>Value |
|---------------------------------------------|-----------------|------------|
|---------------------------------------------|-----------------|------------|

|                                                                  |      |     |
|------------------------------------------------------------------|------|-----|
| sp Q03396.1 L_SV5WR RecName: Full=RNA-directed RNA polymerase... | 28.9 | 2.4 |
|------------------------------------------------------------------|------|-----|

#### ALIGNMENTS

>sp|Q03396.1|L\_SV5WR RecName: Full=RNA-directed RNA polymerase L; Short=Protein L;

AltName: Full=Large structural protein; AltName: Full=Replicase;

AltName: Full=Transcriptase; Includes: RecName: Full=RNA-directed

RNA polymerase; Includes: RecName: Full=mRNA (guanine-N(7)-)-methyltransferase;

Includes: RecName: Full=mRNA

guanylyltransferase

Length=2255

Score = 28.9 bits (63), Expect = 2.4, Method: Composition-based stats.

Identities = 15/29 (52%), Positives = 17/29 (59%), Gaps = 3/29 (10%)

Frame = -3

|       |     |                                |     |
|-------|-----|--------------------------------|-----|
| Query | 132 | PGPADRRILLN---SDGFDPSGTAQPTTS  | 55  |
|       |     | P P +RR+LLN D FDPS Q TS        |     |
| Sbjct | 507 | PNPFNRRLLLNLFLGDDKFDPSVELQYVTS | 535 |

Query= 24

Length=122

| Sequences producing significant alignments: | Score<br>(Bits) | E<br>Value |
|---------------------------------------------|-----------------|------------|
|---------------------------------------------|-----------------|------------|

|                                                            |      |     |
|------------------------------------------------------------|------|-----|
| sp Q29293.1 RL3_PIG RecName: Full=60S ribosomal protein L3 | 26.2 | 8.5 |
|------------------------------------------------------------|------|-----|

#### ALIGNMENTS

>sp|Q29293.1|RL3\_PIG RecName: Full=60S ribosomal protein L3

Length=130

Score = 26.2 bits (56), Expect = 8.5, Method: Composition-based stats.

Identities = 10/18 (56%), Positives = 13/18 (72%), Gaps = 0/18 (0%)

Frame = +2

|       |     |                    |     |
|-------|-----|--------------------|-----|
| Query | 8   | LEDSAVNRMGRFESYGEV | 61  |
|       |     | L D ++N +GRF YGEV  |     |
| Sbjct | 106 | LSDKSINPLGRFVHYGEV | 123 |

Query= 25

Length=136

| Sequences producing significant alignments: | Score<br>(Bits) | E<br>Value |
|---------------------------------------------|-----------------|------------|
|---------------------------------------------|-----------------|------------|

|                                                            |      |     |
|------------------------------------------------------------|------|-----|
| sp Q29293.1 RL3_PIG RecName: Full=60S ribosomal protein L3 | 26.9 | 5.8 |
|------------------------------------------------------------|------|-----|

## ALIGNMENTS

>sp|Q29293.1|RL3\_PIG RecName: Full=60S ribosomal protein L3  
Length=130

Score = 26.9 bits (58), Expect = 5.8, Method: Compositional matrix adjust.  
Identities = 10/19 (53%), Positives = 13/19 (68%), Gaps = 0/19 (0%)  
Frame = +2

Query 8 LEDSAVNRMGRFESYGEV 64  
L D ++N +GRF YGEV  
Sbjct 106 LSDKSINPLGRFVHYGEVT 124

Query= 26

Length=143

|                                             | Score  | E     |
|---------------------------------------------|--------|-------|
| Sequences producing significant alignments: | (Bits) | Value |

|                                                                  |      |     |
|------------------------------------------------------------------|------|-----|
| sp B7VIS0.1 GLND_VIBSL RecName: Full=[Protein-PII] uridylyltr... | 27.7 | 5.1 |
|------------------------------------------------------------------|------|-----|

## ALIGNMENTS

>sp|B7VIS0.1|GLND\_VIBSL RecName: Full=[Protein-PII] uridylyltransferase;  
Short=PII uridylyl-transferase;  
AltName: Full=UTase; AltName: Full=Uridylyl-removing  
enzyme  
Length=873

Score = 27.7 bits (60), Expect = 5.1, Method: Composition-based stats.  
Identities = 16/37 (43%), Positives = 19/37 (51%), Gaps = 2/37 (5%)  
Frame = +3

Query 6 SWKIRLLTEWVGSNPTAKLMRRHLHCGVTATDKFRHN 116  
SWK LL E S T + +RR L V D+ RHN  
Sbjct 591 SWKRTLLAELFHS--TQRALRRGLENPVDVRDIRHN 625

Query= 27

Length=133

|                                             | Score  | E     |
|---------------------------------------------|--------|-------|
| Sequences producing significant alignments: | (Bits) | Value |

|                                                                  |      |     |
|------------------------------------------------------------------|------|-----|
| sp A9B5T5.1 SYK_HERA2 RecName: Full=Lysine--tRNA ligase; AltN... | 29.3 | 1.5 |
|------------------------------------------------------------------|------|-----|

## ALIGNMENTS

>sp|A9B5T5.1|SYK\_HERA2 RecName: Full=Lysine--tRNA ligase; AltName: Full=Lysyl-  
tRNA synthetase;  
Short=LysRS  
Length=492

Score = 29.3 bits (64), Expect = 1.5, Method: Composition-based stats.  
Identities = 20/43 (47%), Positives = 25/43 (58%), Gaps = 8/43 (19%)

Frame = -2

```
Query 126  ESNDL-----GKLCLNLSEGVEPVLARVPERRFTLQGPSAVRD 13
          E NDL      GKL      + G+EP  ARVP+R  TL    +AVR+
Sbjct  2    ELNDLQQTRYGKLQALQAAGIEPYPARVPQRTHTL---TAVRE 41
```

Query= 28

Length=124

|                                             | Score  | E     |
|---------------------------------------------|--------|-------|
| Sequences producing significant alignments: | (Bits) | Value |

|                                                                  |      |      |
|------------------------------------------------------------------|------|------|
| sp B3PIT8.1 MNMG_CELJU RecName: Full=tRNA uridine 5-carboxyme... | 32.0 | 0.18 |
|------------------------------------------------------------------|------|------|

#### ALIGNMENTS

```
>sp|B3PIT8.1|MNMG_CELJU RecName: Full=tRNA uridine 5-carboxymethylaminomethyl
modification
enzyme MnmG; AltName: Full=Glucose-inhibited division
protein A
Length=638
```

Score = 32.0 bits (71), Expect = 0.18, Method: Composition-based stats.  
 Identities = 15/31 (48%), Positives = 20/31 (65%), Gaps = 0/31 (0%)  
 Frame = +1

```
Query 31  SLKGEPSSGEYACPQVRVESLRTGWTERIPD 123
          SLKGEP +GE A  QV +E+    G+ +R  D
Sbjct 525  SLKGEPLAGEAAAEQVEIEAKYAGYIDRQQD 555
```

Query= 29

Length=134

|                                             | Score  | E     |
|---------------------------------------------|--------|-------|
| Sequences producing significant alignments: | (Bits) | Value |

|                                                                  |      |     |
|------------------------------------------------------------------|------|-----|
| sp B2RKK1.1 LEPA_PORG3 RecName: Full=Elongation factor 4; Sho... | 28.1 | 3.4 |
| sp Q7MV56.1 LEPA_PORGI RecName: Full=Elongation factor 4; Sho... | 27.7 | 4.2 |

#### ALIGNMENTS

```
>sp|B2RKK1.1|LEPA_PORG3 RecName: Full=Elongation factor 4; Short=EF-4; AltName:
Full=Ribosomal
back-translocase LepA
Length=595
```

Score = 28.1 bits (61), Expect = 3.4, Method: Composition-based stats.  
 Identities = 12/37 (32%), Positives = 20/37 (54%), Gaps = 3/37 (8%)  
 Frame = -2

```
Query 124  DPSGTAQPTTAERIERPW---QVMSELIWVHPSRTFC 23
          +PSG +PT + IE P+    V++    ++ P  T  C
Sbjct 385  NPSGLPEPTLIDHIEEPFIRASVITNTAYIGPIMTLC 421
```

```
>sp|Q7MV56.1|LEPA_PORGI RecName: Full=Elongation factor 4; Short=EF-4; AltName:
```

Full=Ribosomal  
back-translocase LepA  
Length=595

Score = 27.7 bits (60), Expect = 4.2, Method: Composition-based stats.  
Identities = 12/37 (32%), Positives = 20/37 (54%), Gaps = 3/37 (8%)  
Frame = -2

Query 124 DPSGTAQPTTAERIERPW---QVMSELIWVHPSRTFC 23  
+PSG +PT + IE P+ V++ ++ P T C  
Sbjct 385 NPSGLLEPTLIDHIEEPFIRASVITNTAYIGPIMTLC 421

Query= 30

Length=124

| Sequences producing significant alignments: |                                            |      | Score<br>(Bits) | E<br>Value |
|---------------------------------------------|--------------------------------------------|------|-----------------|------------|
| sp B1JKQ0.1 PYRF_YERPY                      | RecName: Full=Orotidine 5'-phosphate d...  | 28.5 | 2.2             |            |
| sp P58644.1 PYRF_YERPE                      | RecName: Full=Orotidine 5'-phosphate d...  | 28.5 | 2.2             |            |
| sp Q66AI1.1 PYRF_YERPS                      | RecName: Full=Orotidine 5'-phosphate d...  | 28.1 | 2.3             |            |
| sp A8FVN0.1 PYRF_SHESH                      | RecName: Full=Orotidine 5'-phosphate d...  | 28.1 | 2.8             |            |
| sp B4RDU2.1 FMT_PHEZH                       | RecName: Full=Methionyl-tRNA formyltran... | 27.3 | 4.6             |            |
| sp A4WAY2.1 PYRF_ENT38                      | RecName: Full=Orotidine 5'-phosphate d...  | 26.6 | 7.6             |            |
| sp A1JM26.1 PYRF_YERE8                      | RecName: Full=Orotidine 5'-phosphate d...  | 26.6 | 8.9             |            |

#### ALIGNMENTS

>sp|B1JKQ0.1|PYRF\_YERPY RecName: Full=Orotidine 5'-phosphate decarboxylase;  
AltName:  
Full=OMP decarboxylase; Short=OMPDCase; Short=OMPdecase  
Length=245

Score = 28.5 bits (62), Expect = 2.2, Method: Composition-based stats.  
Identities = 13/36 (36%), Positives = 18/36 (50%), Gaps = 0/36 (0%)  
Frame = -2

Query 117 RDSTRTCGQAYSPELCRGFVQSSRFTLQGPSAVRDV 10  
+D+ SP+ CR V FTL GP +RD+  
Sbjct 26 KDAALAFADQVSPQDCRLKVGKEMFTLYGPELIRDL 61

>sp|P58644.1|PYRF\_YERPE RecName: Full=Orotidine 5'-phosphate decarboxylase;  
AltName:  
Full=OMP decarboxylase; Short=OMPDCase; Short=OMPdecase  
sp|Q1CJ05.1|PYRF\_YERPN RecName: Full=Orotidine 5'-phosphate decarboxylase;  
AltName:  
Full=OMP decarboxylase; Short=OMPDCase; Short=OMPdecase  
sp|Q1C7L9.1|PYRF\_YERPA RecName: Full=Orotidine 5'-phosphate decarboxylase;  
AltName:  
Full=OMP decarboxylase; Short=OMPDCase; Short=OMPdecase  
sp|A4TJ45.1|PYRF\_YERPP RecName: Full=Orotidine 5'-phosphate decarboxylase;  
AltName:  
Full=OMP decarboxylase; Short=OMPDCase; Short=OMPdecase  
sp|A9R8T1.1|PYRF\_YERPG RecName: Full=Orotidine 5'-phosphate decarboxylase;  
AltName:  
Full=OMP decarboxylase; Short=OMPDCase; Short=OMPdecase  
Length=245



Score = 28.5 bits (62), Expect = 2.2, Method: Composition-based stats.  
 Identities = 13/36 (36%), Positives = 18/36 (50%), Gaps = 0/36 (0%)  
 Frame = -2

Query 117 RDSTRTCGQAYSPELCRGFVQSSRFTLQGPSAVRDV 10  
 +D+ SP+ CR V FTL GP +RD+  
 Sbjct 26 KDAALAFADQVSPQDCRLKVGKEMFTLYGPELIRDL 61

>sp|Q66AI1.1|PYRF\_YERPS RecName: Full=Orotidine 5'-phosphate decarboxylase;  
 AltName:  
 Full=OMP decarboxylase; Short=OMPDCase; Short=OMPdecase  
 sp|A7FI10.1|PYRF\_YERP3 RecName: Full=Orotidine 5'-phosphate decarboxylase;  
 AltName:  
 Full=OMP decarboxylase; Short=OMPDCase; Short=OMPdecase  
 sp|B2K4I4.1|PYRF\_YERPB RecName: Full=Orotidine 5'-phosphate decarboxylase;  
 AltName:  
 Full=OMP decarboxylase; Short=OMPDCase; Short=OMPdecase  
 Length=245

Score = 28.1 bits (61), Expect = 2.3, Method: Composition-based stats.  
 Identities = 13/36 (36%), Positives = 18/36 (50%), Gaps = 0/36 (0%)  
 Frame = -2

Query 117 RDSTRTCGQAYSPELCRGFVQSSRFTLQGPSAVRDV 10  
 +D+ SP+ CR V FTL GP +RD+  
 Sbjct 26 KDAALAFADQVSPQDCRLKVGKEMFTLYGPELIRDL 61

>sp|A8FVN0.1|PYRF\_SHESH RecName: Full=Orotidine 5'-phosphate decarboxylase;  
 AltName:  
 Full=OMP decarboxylase; Short=OMPDCase; Short=OMPdecase  
 Length=234

Score = 28.1 bits (61), Expect = 2.8, Method: Composition-based stats.  
 Identities = 11/24 (46%), Positives = 15/24 (63%), Gaps = 0/24 (0%)  
 Frame = -2

Query 81 PELCRGFVQSSRFTLQGPSAVRDV 10  
 P++CR V FTL GP V+D+  
 Sbjct 27 PQMCRLKVGKEMFTLFGPELVKDI 50

>sp|B4RDU2.1|FMT\_PHEZH RecName: Full=Methionyl-tRNA formyltransferase  
 Length=308

Score  
 = 27.3 bits (59), Expect = 4.6, Method: Composition-based stats.  
 Identities = 14/34 (41%), Positives = 20/34 (59%), Gaps = 0/34 (0%)  
 Frame = -3

Query 113 TQPGPADRRILLNSVGDSFSPAGSPFKDLLLLGT 12  
 T+ GP + LL++ D+ PAG D LL+GT  
 Sbjct 239 TEKGPVRVKALLSAFEDAEGPAGETLDDRLLVGT 272

>sp|Q11GT5.1|DNLJ\_MESSB RecName: Full=DNA ligase; AltName:  
 Full=Polydeoxyribonucleotide  
 synthase [NAD(+)]  
 Length=703

Score = 27.3 bits (59), Expect = 6.5, Method: Composition-based stats.  
 Identities = 11/18 (61%), Positives = 14/18 (78%), Gaps = 0/18 (0%)  
 Frame = +2

```

Query   68   RQSSGEYACPQVRVESLR   121
          R+  SGE+ACP   R+E  LR
Sbjct   442  RRCSGEFACPFQRIEHLR   459

```

```

>sp|A4WAY2.1|PYRF_ENT38 RecName: Full=Orotidine 5'-phosphate decarboxylase;
AltName:
Full=OMP decarboxylase; Short=OMPDCase; Short=OMPdecase
Length=246

```

```

Score = 26.6 bits (57), Expect = 7.6, Method: Compositional matrix adjust.
Identities = 15/36 (42%), Positives = 16/36 (44%), Gaps = 0/36 (0%)
Frame = -2

```

```

Query   117  RDSTRTCGQAYSPELCRGFVQSSRFTLQGPSAVRDV   10
          RDS          P CR V      FTL GP VRD+
Sbjct   26   RDSALAFVDLIDPRDCRLKVGKEMFTLFGPQIVRDL   61

```

```

>sp|A1JM26.1|PYRF_YERE8 RecName: Full=Orotidine 5'-phosphate decarboxylase;
AltName:
Full=OMP decarboxylase; Short=OMPDCase; Short=OMPdecase
Length=246

```

```

Score = 26.6 bits (57), Expect = 8.9, Method: Composition-based stats.
Identities = 13/36 (36%), Positives = 17/36 (47%), Gaps = 0/36 (0%)
Frame = -2

```

```

Query   117  RDSTRTCGQAYSPELCRGFVQSSRFTLQGPSAVRDV   10
          +D+          +P CR V      FTL GP VRD+
Sbjct   26   KDAALAFADRVNPRDCRLKVGKEMFTLYGPQLVRDL   61

```

Query= 31

Length=119

| Sequences producing significant alignments:                      | Score<br>(Bits) | E<br>Value |
|------------------------------------------------------------------|-----------------|------------|
| sp Q9UMX2.1 OAZ3_HUMAN RecName: Full=Ornithine decarboxylase ... | 27.7            | 2.9        |
| sp Q9CP62.1 MTNN_PASMU RecName: Full=5'-methylthioadenosine/S... | 27.7            | 3.5        |

#### ALIGNMENTS

```

>sp|Q9UMX2.1|OAZ3_HUMAN RecName: Full=Ornithine decarboxylase antizyme 3;
Short=AZ3;
Short=ODC-Az 3
Length=187

```

```

Score = 27.7 bits (60), Expect = 2.9, Method: Compositional matrix adjust.
Identities = 12/28 (43%), Positives = 15/28 (54%), Gaps = 0/28 (0%)
Frame = -2

```

```

Query   118  QNESNDLGKLCNLNLSVSGIRSVQPVHPS   35
          QN+ ND G L      S G      V+P HP+
Sbjct   134  QNDRNDRGALLRAFSYMGFEVVRPDHPA   161

```

```

>sp|Q9CP62.1|MTNN_PASMU RecName: Full=5'-methylthioadenosine/S-
adenosylhomocysteine nucleosidase;
Short=MTA/SAH nucleosidase; Short=MTAN; AltName:
Full=5'-methylthioadenosine nucleosidase; Short=MTA nucleosidase;

```

AltName: Full=S-adenosylhomocysteine nucleosidase; Short=AdoHcy  
nucleosidase; Short=SAH nucleosidase; Short=SRH  
nucleosidase  
Length=229

Score = 27.7 bits (60), Expect = 3.5, Method: Composition-based stats.  
Identities = 14/33 (42%), Positives = 19/33 (58%), Gaps = 2/33 (6%)  
Frame = -1

Query 119 AERI--ERPWQVMSELICVGDSFSPAGSPFKDL 27  
AE+I ++ QV LIC GDSF G+P +  
Sbjct 129 AEKIAVQQQQQVKRGLICSGDSFIQGGTPLAQI 161

Query= 32

Length=144

| Sequences producing significant alignments:                      | Score<br>(Bits) | E<br>Value |
|------------------------------------------------------------------|-----------------|------------|
| sp Q0V6M5.1 LCPS_PHANO RecName: Full=Bifunctional lycopene cy... | 27.3            | 7.3        |

#### ALIGNMENTS

>sp|Q0V6M5.1|LCPS\_PHANO RecName: Full=Bifunctional lycopene cyclase/phytoene synthase;

Includes: RecName: Full=Lycopene beta-cyclase; AltName: Full=Lycopene cyclase; Includes: RecName: Full=Phytoene synthase

Length=585

Score = 27.3 bits (59), Expect = 7.3, Method: Composition-based stats.  
Identities = 13/29 (45%), Positives = 18/29 (62%), Gaps = 1/29 (3%)  
Frame = +2

Query 41 VNQWWAGPYQMDRSHLL\*LEDSAVNRMGR 127  
+N W PY+ DR+ L L+D AV R+ R  
Sbjct 268 INALWVSPYKYDRARLAGLQD-AVLRLKR 295

Query= 33

Length=148

| Sequences producing significant alignments:                       | Score<br>(Bits) | E<br>Value |
|-------------------------------------------------------------------|-----------------|------------|
| sp A8ABM5.1 EF1A_IGNH4 RecName: Full=Elongation factor 1-alpha... | 29.6            | 1.1        |

#### ALIGNMENTS

>sp|A8ABM5.1|EF1A\_IGNH4 RecName: Full=Elongation factor 1-alpha; Short=EF-1-alpha; AltName:

Full=Elongation factor Tu; Short=EF-Tu

Length=442

Score = 29.6 bits (65), Expect = 1.1, Method: Composition-based stats.  
Identities = 17/46 (37%), Positives = 25/46 (54%), Gaps = 5/46 (11%)  
Frame = -3

```

Query   146  AVGFEP-----THSVNSRIFQLQQGVEPVLARVPERRSGGTQPGPA   24
          AVG+ P      T SV SRI +++Q ++P   +V E      +PG A
Sbjct   344  AVGYTPVIHAHTASVASRIIEIKQKIDPRTGKVIEENPSFLKPGDA   389

```

Query= 34

Length=116

|  |  | Score  | E     |
|--|--|--------|-------|
|  |  | (Bits) | Value |

|                         |                                           |      |     |
|-------------------------|-------------------------------------------|------|-----|
| sp Q9FY99.2 G6PD2_ARATH | RecName: Full=Glucose-6-phosphate 1-d...  | 27.3 | 5.4 |
| sp B2SX19.1 GPDA_BURPP  | RecName: Full=Glycerol-3-phosphate deh... | 26.6 | 8.5 |

#### ALIGNMENTS

```

>sp|Q9FY99.2|G6PD2_ARATH RecName: Full=Glucose-6-phosphate 1-dehydrogenase 2,
chloroplastic;
Short=G6PD2; Short=G6PDH2; Flags: Precursor
Length=596

```

Score = 27.3 bits (59), Expect = 5.4, Method: Compositional matrix adjust.  
 Identities = 13/25 (52%), Positives = 14/25 (56%), Gaps = 0/25 (0%)  
 Frame = -2

```

Query   106  SFSPARGSNPY*PEFLSGGPEGLNP   32
          SFSP G      FLS P+GLNP
Sbjct   20   SFSPVNGDRHRSLSFLSASPQGLNP   44

```

```

>sp|B2SX19.1|GPDA_BURPP RecName: Full=Glycerol-3-phosphate dehydrogenase
[NAD(P)+]; AltName:
Full=NAD(P)H-dependent glycerol-3-phosphate dehydrogenase
Length=332

```

Score = 26.6 bits (57), Expect = 8.5, Method: Compositional matrix adjust.  
 Identities = 14/36 (39%), Positives = 20/36 (56%), Gaps = 2/36 (6%)  
 Frame = -1

```

Query   116  CRGFVQSSQGV--EPVLARVPERRSGGTQPGPADRR   15
          C+GF SQ + + V A +PE +S G GP+ R
Sbjct   107  CKGFEADSQLMPHQVVAELPEHKSNGVLSGPSFAR   142

```

```

>sp|Q9I2N4.1|MODC_PSEAE RecName: Full=Molybdenum import ATP-binding protein ModC
Length=361

```

Score = 26.6 bits (57), Expect = 10.0, Method: Compositional matrix adjust.  
 Identities = 11/18 (61%), Positives = 14/18 (78%), Gaps = 0/18 (0%)  
 Frame = -1

```

Query   89   GVEPVLARVPERRSGGTQ   36
          G+E +L R+PER SGG Q
Sbjct   123  GIEHLLERMPERLSGGEQ   140

```

Query= 35

Length=138

| Sequences producing significant alignments: | Score<br>(Bits) | E<br>Value |
|---------------------------------------------|-----------------|------------|
|---------------------------------------------|-----------------|------------|

|                                                                  |      |     |
|------------------------------------------------------------------|------|-----|
| sp A7HIL1.1 Y4379_ANADF RecName: Full=Probable RNA methyltran... | 26.9 | 7.6 |
| sp Q8ZIN5.1 KHSE_YERPE RecName: Full=Homoserine kinase; Short... | 26.9 | 7.9 |
| sp Q2NVZ5.1 KHSE_SODGM RecName: Full=Homoserine kinase; Short... | 26.9 | 8.5 |
| sp A1JJC7.1 KHSE_YERE8 RecName: Full=Homoserine kinase; Short... | 26.6 | 8.9 |

#### ALIGNMENTS

>sp|A7HIL1.1|Y4379\_ANADF RecName: Full=Probable RNA methyltransferase  
 Ana109\_4379  
 Length=336

Score = 26.9 bits (58), Expect = 7.6, Method: Compositional matrix adjust.  
 Identities = 11/24 (46%), Positives = 17/24 (71%), Gaps = 0/24 (0%)  
 Frame = -1

|       |     |                           |     |
|-------|-----|---------------------------|-----|
| Query | 102 | GAERIERPWQVMSELIWVRDSTR   | 31  |
|       |     | G R R W++++L+ VR DSTR     |     |
| Sbjct | 120 | GLARSLRAWWEIVAQLLHVRADSTR | 143 |

>sp|Q8ZIN5.1|KHSE\_YERPE RecName: Full=Homoserine kinase; Short=HK; Short=HSK  
 sp|Q66ET8.1|KHSE\_YERPS RecName: Full=Homoserine kinase; Short=HK; Short=HSK  
 sp|Q1C0K9.1|KHSE\_YERPA RecName: Full=Homoserine kinase; Short=HK; Short=HSK  
 sp|Q1CMW6.1|KHSE\_YERP3 RecName: Full=Homoserine kinase; Short=HK; Short=HSK  
 sp|A4TQG9.1|KHSE\_YERPP RecName: Full=Homoserine kinase; Short=HK; Short=HSK  
 sp|A7FMF2.1|KHSE\_YERP3 RecName: Full=Homoserine kinase; Short=HK; Short=HSK  
 sp|B2K3L2.1|KHSE\_YERP3 RecName: Full=Homoserine kinase; Short=HK; Short=HSK  
 sp|A9R025.1|KHSE\_YERPG RecName: Full=Homoserine kinase; Short=HK; Short=HSK  
 sp|B1JL13.1|KHSE\_YERPY RecName: Full=Homoserine kinase; Short=HK; Short=HSK  
 Length=309

Score = 26.9 bits (58), Expect = 7.9, Method: Composition-based stats.  
 Identities = 13/31 (42%), Positives = 19/31 (61%), Gaps = 0/31 (0%)  
 Frame = -2

|       |     |                                 |     |
|-------|-----|---------------------------------|-----|
| Query | 131 | RTRISPSS*AAQNESNDLGKLCNLNSGSGGT | 39  |
|       |     | RT++ P AA+ + D+G L +SGSG T      |     |
| Sbjct | 235 | RTQLLPGFAAARQAAQDIGALACGISGSGPT | 265 |

>sp|Q2NVZ5.1|KHSE\_SODGM RecName: Full=Homoserine kinase; Short=HK; Short=HSK  
 Length=310

Score = 26.9 bits (58), Expect = 8.5, Method: Composition-based stats.  
 Identities = 15/39 (38%), Positives = 20/39 (51%), Gaps = 0/39 (0%)  
 Frame = -2

|       |     |                                         |     |
|-------|-----|-----------------------------------------|-----|
| Query | 131 | RTRISPSS*AAQNESNDLGKLCNLNSGSGGTQPGPADRR | 15  |
|       |     | RTR+ P A+ D+G L +SGSG T DR+             |     |
| Sbjct | 235 | RTRLLPGFADARQAVGDIGALACGISGSGPTLFAICDRQ | 273 |

>sp|A1JJC7.1|KHSE\_YERE8 RecName: Full=Homoserine kinase; Short=HK; Short=HSK  
Length=309

Score = 26.6 bits (57), Expect = 8.9, Method: Composition-based stats.  
Identities = 13/31 (42%), Positives = 19/31 (61%), Gaps = 0/31 (0%)  
Frame = -2

Query 131 RTRISPSS\*AAQNESNDLGKLCNLNSGSGGT 39  
RT++ P AA+ + D+G L +SGSG T  
Sbjct 235 RTQLLPGFAAARQAAQDIGALACGISGSGPT 265

Query= 36

Length=146

|                                             | Score  | E     |
|---------------------------------------------|--------|-------|
| Sequences producing significant alignments: | (Bits) | Value |

|                                                                  |      |     |
|------------------------------------------------------------------|------|-----|
| sp Q9SW95.2 SYNC2_ARATH RecName: Full=Asparagine--tRNA ligase... | 29.3 | 1.9 |
|------------------------------------------------------------------|------|-----|

#### ALIGNMENTS

>sp|Q9SW95.2|SYNC2\_ARATH RecName: Full=Asparagine--tRNA ligase, cytoplasmic 2;  
AltName:  
Full=Asparaginyl-tRNA synthetase 2; Short=AsnRS 2  
Length=638

Score = 29.3 bits (64), Expect = 1.9, Method: Composition-based stats.  
Identities = 12/40 (30%), Positives = 17/40 (43%), Gaps = 0/40 (0%)  
Frame = -3

Query 132 GPSAVRDVILNAERIERPWQVMSELIWVRDSTRTCGQAY 13  
GP + D I NA + W V +E+ + D C Y  
Sbjct 401 GPRFIADKIDNARHLAEKWNVETEMAFaelDDAMDCADEY 440

Query 23 PQVRVESLRTGWTERIPDSLGSRP 94  
PQVR+ T W++R P +L S P  
Sbjct 833 PQVRIAPTVTTWSDRTPALPSHP 856

Query= 37

Length=139

|                                             | Score  | E     |
|---------------------------------------------|--------|-------|
| Sequences producing significant alignments: | (Bits) | Value |

|                                                                  |      |     |
|------------------------------------------------------------------|------|-----|
| sp P49327.3 FAS_HUMAN RecName: Full=Fatty acid synthase; Incl... | 29.6 | 1.2 |
|------------------------------------------------------------------|------|-----|

#### ALIGNMENTS

>sp|P49327.3|FAS\_HUMAN RecName: Full=Fatty acid synthase; Includes: RecName:  
Full=[Acyl-carrier-protein]  
S-acetyltransferase; Includes: RecName:  
Full=[Acyl-carrier-protein] S-malonyltransferase; Includes:  
RecName: Full=3-oxoacyl-[acyl-carrier-protein] synthase; Includes:

RecName: Full=3-oxoacyl-[acyl-carrier-protein] reductase;  
 Includes: RecName: Full=3-hydroxyacyl-[acyl-carrier-protein]  
 dehydratase; Includes: RecName: Full=Enoyl-[acyl-carrier-protein]  
 reductase; Includes: RecName: Full=Oleoyl-[acyl-carrier-protein]  
 hydrolase  
 Length=2511

Score = 29.6 bits (65), Expect = 1.2, Method: Compositional matrix adjust.  
 Identities = 14/37 (38%), Positives = 20/37 (54%), Gaps = 0/37 (0%)  
 Frame = -3

Query 137 FTLQGPSAVRDVILNRWLRSIWYGPAHHWSGGTQPGP 27  
 +TLQ + V DV+++RWLR G H T+ P  
 Sbjct 1067 YTLQDKAQVADVVSRLRVTVAGGVHISGLHTESAP 1103

Query= 38

Length=117

| Sequences producing significant alignments: | Score<br>(Bits) | E<br>Value |
|---------------------------------------------|-----------------|------------|
|---------------------------------------------|-----------------|------------|

|                                                                  |      |     |
|------------------------------------------------------------------|------|-----|
| sp Q0V6M5.1 LCPS_PHANO RecName: Full=Bifunctional lycopene cy... | 27.3 | 6.5 |
|------------------------------------------------------------------|------|-----|

#### ALIGNMENTS

>sp|Q0V6M5.1|LCPS\_PHANO RecName: Full=Bifunctional lycopene cyclase/phytoene  
 synthase;  
 Includes: RecName: Full=Lycopene beta-cyclase; AltName: Full=Lycopene  
 cyclase; Includes: RecName: Full=Phytoene synthase  
 Length=585

Score = 27.3 bits (59), Expect = 6.5, Method: Compositional matrix adjust.  
 Identities = 9/18 (50%), Positives = 13/18 (72%), Gaps = 0/18 (0%)  
 Frame = +1

Query 58 WAGPYQMDRSHLAGL NES 111  
 W PY+ DR+ LAGL ++  
 Sbjct 272 WVSPYKYDRARLAGLQDA 289

Query= 39

Length=116

| Sequences producing significant alignments: | Score<br>(Bits) | E<br>Value |
|---------------------------------------------|-----------------|------------|
|---------------------------------------------|-----------------|------------|

|                                                                  |      |     |
|------------------------------------------------------------------|------|-----|
| sp A1K5J1.1 SYE_AZOSB RecName: Full=Glutamate--tRNA ligase; A... | 28.1 | 3.0 |
|------------------------------------------------------------------|------|-----|

#### ALIGNMENTS

>sp|A1K5J1.1|SYE\_AZOSB RecName: Full=Glutamate--tRNA ligase; AltName: Full=Glutamyl-tRNA synthetase; Short=GluRS  
Length=467

Score = 28.1 bits (61), Expect = 3.0, Method: Compositional matrix adjust.  
Identities = 15/28 (54%), Positives = 18/28 (64%), Gaps = 1/28 (4%)  
Frame = +3

Query 27 RSGLSP-SGPAHETTLALRSR\*AGLNE 107  
R G+ P +GPA E +AL DR A LNE  
Sbjct 336 RRGVDPEAGPALEQVVALYKDRSANLNE 363

Query= 40

Length=126

| Sequences producing significant alignments:                      | Score<br>(Bits) | E<br>Value |
|------------------------------------------------------------------|-----------------|------------|
| sp Q2KA45.1 PUR5_RHIEC RecName: Full=Phosphoribosylformylglyc... | 26.6            | 8.6        |

#### ALIGNMENTS

>sp|Q2KA45.1|PUR5\_RHIEC RecName: Full=Phosphoribosylformylglycinamide cyclo-  
ligase;  
AltName: Full=AIR synthase; AltName: Full=AIRS; AltName: Full=Phosphoribosyl-  
aminoimidazole  
synthetase  
Length=357

Score = 26.6 bits (57), Expect = 8.6, Method: Composition-based stats.  
Identities = 15/39 (38%), Positives = 21/39 (54%), Gaps = 1/39 (3%)  
Frame = +3

Query 9 FRHNLPRSFDSFCAAQ-ELGLIRVRPPSGGLGRTRWIEA 122  
F N+PR AA+ +LG ++V P L RT +EA  
Sbjct 259 FPEINIPRVLPEHLAAEIDLGA VKVPPVFSWLARTGGVEA 297

Query= 41

Length=143

| Sequences producing significant alignments:                      | Score<br>(Bits) | E<br>Value |
|------------------------------------------------------------------|-----------------|------------|
| sp Q8GXG1.2 ASPG2_ARATH RecName: Full=Probable isoaspartyl pe... | 27.7            | 5.2        |

#### ALIGNMENTS

>sp|Q8GXG1.2|ASPG2\_ARATH RecName: Full=Probable isoaspartyl peptidase/L-  
asparaginase 2;  
AltName: Full=L-asparagine amidohydrolase 2; Contains: RecName:  
Full=Isoaspartyl peptidase/L-asparaginase 2 subunit alpha;  
Contains: RecName: Full=Isoaspartyl peptidase/L-asparaginase  
2 subunit beta; Flags: Precursor



Length=325

Score = 27.7 bits (60), Expect = 5.2, Method: Composition-based stats.  
Identities = 13/24 (54%), Positives = 14/24 (58%), Gaps = 0/24 (0%)  
Frame = -2

Query 76 G\*QPNLPATAQNESNDLGKLCNL 5  
G PNLPA Q E+ L CLNL  
Sbjct 13 GIDPNLPAERQEEAKQLLTRCLNL 36

Query= 42

Length=151

| Sequences producing significant alignments:                      | Score<br>(Bits) | E<br>Value |
|------------------------------------------------------------------|-----------------|------------|
| sp Q8GXG1.2 ASPG2_ARATH RecName: Full=Probable isoaspartyl pe... | 28.5            | 2.8        |

#### ALIGNMENTS

>sp|Q8GXG1.2|ASPG2\_ARATH RecName: Full=Probable isoaspartyl peptidase/L-asparaginase 2;  
AltName: Full=L-asparagine amidohydrolase 2; Contains: RecName:  
Full=Isoaspartyl peptidase/L-asparaginase 2 subunit alpha;  
Contains: RecName: Full=Isoaspartyl peptidase/L-asparaginase  
2 subunit beta; Flags: Precursor  
Length=325

Score = 28.5 bits (62), Expect = 2.8, Method: Composition-based stats.  
Identities = 13/24 (54%), Positives = 14/24 (58%), Gaps = 0/24 (0%)  
Frame = -1

Query 76 G\*QPNLPATAQNESNDLGKLCNL 5  
G PNLPA Q E+ L CLNL  
Sbjct 13 GIDPNLPAERQEEAKQLLTRCLNL 36

Query= 43

Length=129

| Sequences producing significant alignments:                      | Score<br>(Bits) | E<br>Value |
|------------------------------------------------------------------|-----------------|------------|
| sp Q8GXG1.2 ASPG2_ARATH RecName: Full=Probable isoaspartyl pe... | 28.5            | 2.2        |

#### ALIGNMENTS

>sp|Q8GXG1.2|ASPG2\_ARATH RecName: Full=Probable isoaspartyl peptidase/L-asparaginase 2;  
AltName: Full=L-asparagine amidohydrolase 2; Contains: RecName:  
Full=Isoaspartyl peptidase/L-asparaginase 2 subunit alpha;  
Contains: RecName: Full=Isoaspartyl peptidase/L-asparaginase  
2 subunit beta; Flags: Precursor  
Length=325

Score = 28.5 bits (62), Expect = 2.2, Method: Composition-based stats.  
Identities = 13/24 (54%), Positives = 14/24 (58%), Gaps = 0/24 (0%)  
Frame = -3

```

Query   76  G*QPNLPATAQNESNDLGKLCNL  5
          G  PNLPA  Q  E+  L   CLNL
Sbjct   13  GIDPNLPAERQEEAKQLLTRCLNL  36

```

Query= 44

Length=151

|                                             | Score  | E     |
|---------------------------------------------|--------|-------|
| Sequences producing significant alignments: | (Bits) | Value |

|                                                                  |      |     |
|------------------------------------------------------------------|------|-----|
| sp A3QDC9.1 CDD_SHELP RecName: Full=Cytidine deaminase; AltNa... | 27.3 | 6.3 |
|------------------------------------------------------------------|------|-----|

#### ALIGNMENTS

>sp|A3QDC9.1|CDD\_SHELP RecName: Full=Cytidine deaminase; AltName: Full=Cytidine aminohydrolase;

Short=CDA

Length=296

Score = 27.3 bits (59), Expect = 6.3, Method: Compositional matrix adjust.  
 Identities = 13/42 (31%), Positives = 22/42 (52%), Gaps = 0/42 (0%)  
 Frame = -3

```

Query   128  HSVNSRIFQLQRFTLQGPSAVRDVILNAERIERPWQVMSELI  3
          HSV++      +      L G + + D+I+NA      Q M+EL+
Sbjct   98  HSVHAEQSAISHAWLSGETGIEDIIVNASPCGHCRCQFMNELV  139

```

Query= 45

Length=146

|                                             | Score  | E     |
|---------------------------------------------|--------|-------|
| Sequences producing significant alignments: | (Bits) | Value |

|                                                                  |      |     |
|------------------------------------------------------------------|------|-----|
| sp B3PIT8.1 MNMG_CELJU RecName: Full=tRNA uridine 5-carboxyme... | 27.3 | 7.0 |
|------------------------------------------------------------------|------|-----|

#### ALIGNMENTS

>sp|B3PIT8.1|MNMG\_CELJU RecName: Full=tRNA uridine 5-carboxymethylaminomethyl modification

enzyme MnmG; AltName: Full=Glucose-inhibited division

protein A

Length=638

Score = 27.3 bits (59), Expect = 7.0, Method: Composition-based stats.  
 Identities = 12/20 (60%), Positives = 15/20 (75%), Gaps = 0/20 (0%)  
 Frame = +3

```

Query   78  SLKGEPSSGEYACPQVRVES  137
          SLKGEP +GE A  QV +E+
Sbjct   525  SLKGEPLAGEAAAEQVEIEA  544

```

Score = 27.3 bits (59), Expect = 6.0, Method: Composition-based stats.  
Identities = 12/34 (35%), Positives = 23/34 (68%), Gaps = 3/34 (9%)  
Frame = -1

```
Query 134 RWLRSIWYGPAHHWFTLQGPSAVRDVILNAERIE 33
          RW +S + G A H+FT+ P R+++L+ +++E
Sbjct 14 RWDQSTFLGRARHFFTVTDP---RNLLLSGKQLE 44
```

Query= 46

Length=138

| Sequences producing significant alignments: | Score<br>(Bits) | E<br>Value |
|---------------------------------------------|-----------------|------------|
|---------------------------------------------|-----------------|------------|

|                                                                  |      |     |
|------------------------------------------------------------------|------|-----|
| sp A1BGY2.1 KTHY_CHLPD RecName: Full=Thymidylate kinase; AltN... | 28.1 | 2.6 |
| sp Q8FLM0.1 SYL_COREF RecName: Full=Leucine--tRNA ligase; Alt... | 27.3 | 6.4 |
| sp B3EDD6.1 KTHY_CHLL2 RecName: Full=Thymidylate kinase; AltN... | 26.9 | 6.8 |
| sp Q9A842.1 DNLJ_CAUCR RecName: Full=DNA ligase; AltName: Ful... | 26.9 | 9.9 |

#### ALIGNMENTS

>sp|A1BGY2.1|KTHY\_CHLPD RecName: Full=Thymidylate kinase; AltName: Full=dTMP  
kinase  
Length=219

Score = 28.1 bits (61), Expect = 2.6, Method: Composition-based stats.  
Identities = 18/42 (43%), Positives = 24/42 (57%), Gaps = 4/42 (10%)  
Frame = -3

```
Query 136 GVEPVLARVPERRSGGTQPGPADRRILLNSQNESNDLGKLCL 11
          GVE V R P GGT+ R ILL S++E + +G+L L
Sbjct 28 GVESVTIREP----GGTEVAEKIRSILLESRHEISAVGELLL 65
```

>sp|Q8FLM0.1|SYL\_COREF RecName: Full=Leucine--tRNA ligase; AltName: Full=Leucyl-  
tRNA  
synthetase; Short=LeuRS  
Length=957

Score = 27.3 bits (59), Expect = 6.4, Method: Composition-based stats.  
Identities = 11/22 (50%), Positives = 14/22 (64%), Gaps = 0/22 (0%)  
Frame = -2

```
Query 86 STRTCGQAYSPELAERIERPWQ 21
          S ++ Y+PELA IER WQ
Sbjct 11 SAQSLAYRYTPELANAIEREWQ 32
```

>sp|B3EDD6.1|KTHY\_CHLL2 RecName: Full=Thymidylate kinase; AltName: Full=dTMP  
kinase  
Length=219

Score = 26.9 bits (58), Expect = 6.8, Method: Composition-based stats.  
Identities = 13/31 (42%), Positives = 20/31 (65%), Gaps = 0/31 (0%)  
Frame = -3

```
Query 103 RRSGGTQPGPADRRILLNSQNESNDLGKLCL 11
          R GGT+ R+ILL S++E + +G+L L
Sbjct 35 REPGGTEVAEKIRQILLESRHEISPIGELLL 65
```

Query= 47

Length=156

| Sequences producing significant alignments:                      | Score<br>(Bits) | E<br>Value |
|------------------------------------------------------------------|-----------------|------------|
| sp A3MXT2.1 HEM12_PYRCJ RecName: Full=Glutamyl-tRNA reductase... | 30.8            | 0.53       |
| sp B1I165.1 KTHY_DESAP RecName: Full=Thymidylate kinase; AltN... | 27.7            | 5.0        |
| sp Q8FLM0.1 SYL_COREF RecName: Full=Leucine--tRNA ligase; Alt... | 27.3            | 7.1        |
| sp B3EDD6.1 KTHY_CHLL2 RecName: Full=Thymidylate kinase; AltN... | 26.9            | 9.1        |

#### ALIGNMENTS

>sp|A3MXT2.1|HEM12\_PYRCJ RecName: Full=Glutamyl-tRNA reductase 2; Short=GluTR 2  
Length=391

Score = 30.8 bits (68), Expect = 0.53, Method: Compositional matrix adjust.  
Identities = 12/37 (32%), Positives = 20/37 (54%), Gaps = 0/37 (0%)  
Frame = -2

|       |     |                                        |     |
|-------|-----|----------------------------------------|-----|
| Query | 119 | PNLPATAVRRDSTRTCGQAYSPELAERIERPWQVMSE  | 9   |
|       |     | PNLP V+ + R + Y+ E A +E+ W ++ E        |     |
| Sbjct | 270 | PNLPVAVVKIEDLRELAEEYNRRERAGEVEKAWAIVDE | 306 |

>sp|B1I165.1|KTHY\_DESAP RecName: Full=Thymidylate kinase; AltName: Full=dTMP  
kinase  
Length=221

Score = 27.7 bits (60), Expect = 5.0, Method: Composition-based stats.  
Identities = 12/28 (43%), Positives = 18/28 (64%), Gaps = 0/28 (0%)  
Frame = -3

|       |     |                              |    |
|-------|-----|------------------------------|----|
| Query | 124 | NSRIFQLQRSGGTQPGPADRRILLNSQN | 41 |
|       |     | N R+ + GGT+ G A RR+LL++ N    |    |
| Sbjct | 32  | NHRVLVTREPGGTRIGEAVRRVLLDTGN | 59 |

>sp|Q8FLM0.1|SYL\_COREF RecName: Full=Leucine--tRNA ligase; AltName: Full=Leucyl-  
tRNA  
synthetase; Short=LeuRS  
Length=957

Score = 27.3 bits (59), Expect = 7.1, Method: Composition-based stats.  
Identities = 11/22 (50%), Positives = 14/22 (64%), Gaps = 0/22 (0%)  
Frame = -2

|       |    |                        |    |
|-------|----|------------------------|----|
| Query | 86 | STRTCGQAYSPELAERIERPWQ | 21 |
|       |    | S ++ Y+PELA IER WQ     |    |
| Sbjct | 11 | SAQSLAYRYTPELANAIEREWQ | 32 |

>sp|B3EDD6.1|KTHY\_CHLL2 RecName: Full=Thymidylate kinase; AltName: Full=dTMP  
kinase  
Length=219

Score = 26.9 bits (58), Expect = 9.1, Method: Composition-based stats.  
Identities = 13/32 (41%), Positives = 21/32 (66%), Gaps = 0/32 (0%)  
Frame = -3

```

Query   106   LQRSGGTQPGPADRRILLNSQNESNDLGKLCL   11
          L+  GGT+      R+ILL S++E + +G+L L
Sbjct   34   LREPGGTEVAEKIRQILLESRHEISPIGELLL   65

```

Query= 48

Length=139

| Sequences producing significant alignments:                      | Score<br>(Bits) | E<br>Value |
|------------------------------------------------------------------|-----------------|------------|
| sp Q8FLM0.1 SYL_COREF RecName: Full=Leucine--tRNA ligase; Alt... | 27.7            | 5.9        |
| sp Q966C6.3 RL7A_CAEEL RecName: Full=60S ribosomal protein L7a   | 26.9            | 8.3        |
| sp Q04462.2 SYVC_RAT RecName: Full=Valine--tRNA ligase; AltNa... | 26.9            | 9.0        |

#### ALIGNMENTS

```

>sp|Q8FLM0.1|SYL_COREF RecName: Full=Leucine--tRNA ligase; AltName: Full=Leucyl-
tRNA
synthetase; Short=LeuRS
Length=957

```

Score = 27.7 bits (60), Expect = 5.9, Method: Composition-based stats.  
 Identities = 11/22 (50%), Positives = 14/22 (64%), Gaps = 0/22 (0%)  
 Frame = -3

```

Query   86   STRTCGQAYSPELAERIERPWQ   21
          S ++      Y+PELA IER WQ
Sbjct   11   SAQSLAYRYTPELANAIEREWQ   32

```

```

>sp|Q966C6.3|RL7A_CAEEL RecName: Full=60S ribosomal protein L7a
Length=265

```

Score = 26.9 bits (58), Expect = 8.3, Method: Composition-based stats.  
 Identities = 11/29 (38%), Positives = 15/29 (52%), Gaps = 0/29 (0%)  
 Frame = -1

```

Query   103   HWSGGTQPGPADRRILLNSQNESNDLGKL   17
          HW GG      +D + L + + DLGKL
Sbjct   237   HWGGGVMSAKSDAKKLKIERARARDLGKL   265

```

```

>sp|Q04462.2|SYVC_RAT RecName: Full=Valine--tRNA ligase; AltName: Full=Valyl-
tRNA synthetase;
Short=ValRS
Length=1264

```

Score = 26.9 bits (58), Expect = 9.0, Method: Compositional matrix adjust.  
 Identities = 11/30 (37%), Positives = 17/30 (57%), Gaps = 0/30 (0%)  
 Frame = -3

```

Query   113   PSPPLVRRDSTRTCGQAYSPELAERIERPW   24
          P+PP ++D + T +YSP+ E PW
Sbjct   283   PTPPGKKDVSGTMPDSYSPQYVEAAWYPW   312

```

Query= 49

Length=138

| Sequences producing significant alignments: | Score<br>(Bits) | E<br>Value |
|---------------------------------------------|-----------------|------------|
|---------------------------------------------|-----------------|------------|

|                                                                  |      |      |
|------------------------------------------------------------------|------|------|
| sp P16084.1 BGLS_BUTFI RecName: Full=Beta-glucosidase A; AltN... | 30.0 | 0.99 |
|------------------------------------------------------------------|------|------|

## ALIGNMENTS

>sp|P16084.1|BGLS\_BUTFI RecName: Full=Beta-glucosidase A; AltName: Full=Beta-D-glucoside  
glucohydrolase; AltName: Full=Cellobiase; AltName: Full=Gentiobiase  
Length=830

Score = 30.0 bits (66), Expect = 0.99, Method: Composition-based stats.  
Identities = 15/33 (45%), Positives = 17/33 (52%), Gaps = 0/33 (0%)  
Frame = -3

|       |     |                                   |     |
|-------|-----|-----------------------------------|-----|
| Query | 124 | QCKCRLMSWSGGTQPGPADRRILLNSQNESNDL | 26  |
|       |     | Q LM+W GG + G A RILL N S L        |     |
| Sbjct | 227 | QISSVLMWQGGIEGGLAAARILLGKVNPSGKL  | 259 |

Query= 50

Length=129

| Sequences producing significant alignments: | Score<br>(Bits) | E<br>Value |
|---------------------------------------------|-----------------|------------|
|---------------------------------------------|-----------------|------------|

|                                                                  |      |     |
|------------------------------------------------------------------|------|-----|
| sp Q8DLB7.1 PYRD_THEEB RecName: Full=Dihydroorotate dehydroge... | 26.6 | 8.7 |
|------------------------------------------------------------------|------|-----|

## ALIGNMENTS

>sp|Q8DLB7.1|PYRD\_THEEB RecName: Full=Dihydroorotate dehydrogenase (quinone);  
AltName:  
Full=DHodehase; Short=DHOD; Short=DHODase; AltName: Full=Dihydroorotate  
oxidase  
Length=364

Score = 26.6 bits (57), Expect = 8.7, Method: Composition-based stats.  
Identities = 10/29 (34%), Positives = 15/29 (52%), Gaps = 0/29 (0%)  
Frame = +3

|       |    |                                |     |
|-------|----|--------------------------------|-----|
| Query | 21 | LPRSFDSEFCGWTERIPDSCSWKIRLLTEW | 107 |
|       |    | L + F S CGW + C+W + L +W       |     |
| Sbjct | 25 | LHQQLSLCGWLNQDRSLCTWLRQQLQW    | 53  |

Query= 51

Length=134

| Sequences producing significant alignments: | Score<br>(Bits) | E<br>Value |
|---------------------------------------------|-----------------|------------|
|---------------------------------------------|-----------------|------------|

|                                                                  |      |     |
|------------------------------------------------------------------|------|-----|
| sp P49327.3 FAS_HUMAN RecName: Full=Fatty acid synthase; Incl... | 28.5 | 2.7 |
|------------------------------------------------------------------|------|-----|

## ALIGNMENTS

>sp|P49327.3|FAS\_HUMAN RecName: Full=Fatty acid synthase; Includes: RecName: Full=[Acyl-carrier-protein] S-acetyltransferase; Includes: RecName: Full=[Acyl-carrier-protein] S-malonyltransferase; Includes: RecName: Full=3-oxoacyl-[acyl-carrier-protein] synthase; Includes: RecName: Full=3-oxoacyl-[acyl-carrier-protein] reductase; Includes: RecName: Full=3-hydroxyacyl-[acyl-carrier-protein] dehydratase; Includes: RecName: Full=Enoyl-[acyl-carrier-protein] reductase; Includes: RecName: Full=Oleoyl-[acyl-carrier-protein] hydrolase  
Length=2511

Score = 28.5 bits (62), Expect = 2.7, Method: Compositional matrix adjust.  
Identities = 12/27 (44%), Positives = 17/27 (63%), Gaps = 0/27 (0%)  
Frame = -3

Query 132 FTLQGPSAVRDVILNRWLR SIWYGPAH 52  
+TLQ + V DV+++RWLR G H  
Sbjct 1067 YTLQDKAQVADV VVSRWLRVT VAGGVH 1093

Query= 52

Length=139

| Sequences producing significant alignments:                      | Score<br>(Bits) | E<br>Value |
|------------------------------------------------------------------|-----------------|------------|
| sp Q165T7.1 G6PI_ROSDO RecName: Full=Glucose-6-phosphate isom... | 28.9            | 1.9        |

## ALIGNMENTS

>sp|Q165T7.1|G6PI\_ROSDO RecName: Full=Glucose-6-phosphate isomerase; Short=GPI; AltName: Full=Phosphoglucose isomerase; Short=PGI; AltName: Full=Phosphohexose isomerase; Short=PHI  
Length=530

Score = 28.9 bits (63), Expect = 1.9, Method: Composition-based stats.  
Identities = 13/29 (45%), Positives = 17/29 (59%), Gaps = 0/29 (0%)  
Frame = +3

Query 24 PRSFDSFCSGGLGRTRWIEAI\*VQENTPV 110  
PR+FD+F GG R +A +EN PV  
Sbjct 267 PRAFDAFLRGQAMDRHFQAADWRENLPV 2

Query= 53

Length=112

| Sequences producing significant alignments:                      | Score<br>(Bits) | E<br>Value |
|------------------------------------------------------------------|-----------------|------------|
| sp Q0V6M5.1 LCPS_PHANO RecName: Full=Bifunctional lycopene cy... | 27.3            | 6.2        |

## ALIGNMENTS

>sp|Q0V6M5.1|LCPS\_PHANO RecName: Full=Bifunctional lycopene cyclase/phytoene synthase;

Includes: RecName: Full=Lycopene beta-cyclase; AltName: Full=Lycopene cyclase; Includes: RecName: Full=Phytoene synthase  
Length=585

Score = 27.3 bits (59), Expect = 6.2, Method: Compositional matrix adjust.  
Identities = 9/18 (50%), Positives = 13/18 (72%), Gaps = 0/18 (0%)  
Frame = +2

Query 53 WAGPYQMDRSHLAGLNES 106  
W PY+ DR+ LAGL ++  
Sbjct 272 WVSPYKYDRARLAGLQDA  
289

Query= 54

Length=116

Score E  
Sequences producing significant alignments: (Bits) Value

sp|Q1QX56.2|PLSX\_CHRSD RecName: Full=Phosphate acyltransferase... 26.9 6.7

#### ALIGNMENTS

>sp|Q1QX56.2|PLSX\_CHRSD RecName: Full=Phosphate acyltransferase; AltName: Full=Acyl-ACP phosphotransacylase; AltName: Full=Acyl-[acyl-carrier-protein]--phosphate acyltransferase; AltName: Full=Phosphate-acyl-ACP acyltransferase  
Length=379

Score = 26.9 bits (58), Expect = 6.7, Method: Compositional matrix adjust.  
Identities = 12/32 (38%), Positives = 20/32 (63%), Gaps = 0/32 (0%)  
Frame = -1

Query 104 LNPDLRTGVFS\*TQGVEPVLARVPERLSGIRS 9  
++PDL ++ + +E L +P+RLSG RS  
Sbjct 29 MHPDLEIQMYGPRALEDELETLPKRLSGYRS 60

Query= 55

Length=129

Score E  
Sequences producing significant alignments: (Bits) Value

sp|Q2T1H1.2|GPDA\_BURTA RecName: Full=Glycerol-3-phosphate deh... 29.3 1.4  
sp|Q5S2C3.2|PIR\_ARATH RecName: Full=Protein PIR; AltName: Ful... 26.9 8.7

#### ALIGNMENTS

>sp|Q2T1H1.2|GPDA\_BURTA RecName: Full=Glycerol-3-phosphate dehydrogenase [NAD(P)+]; AltName: Full=NAD(P)H-dependent glycerol-3-phosphate dehydrogenase  
Length=332

Score = 29.3 bits (64), Expect = 1.4, Method: Composition-based stats.  
Identities = 15/35 (43%), Positives = 19/35 (54%), Gaps = 6/35 (17%)  
Frame = -3



```

Query  121  LQGPSAVRDVILNSP*DSNLPIRLTAESSYSCRG  17
          L GPS  R+V          LP+ LT  S+S +CRG
Sbjct  135  LSGPSFAREVA-----QGLPVALTVASASAACRG  163

```

```

>sp|Q5S2C3.2|PIR_ARATH RecName: Full=Protein PIR; AltName: Full=PIR of plants;
AltName:
Full=Protein KLUNKER; Short=AtSRA1; AltName: Full=Protein
PIROGI
Length=1282

```

Score = 26.9 bits (58), Expect = 8.7, Method: Composition-based stats.  
 Identities = 15/38 (39%), Positives = 19/38 (50%), Gaps = 1/38 (3%)  
 Frame = +1

```

Query  4      WTERIPDSCSWKIRLLTEWVGSNPTASLGSRP*QQKVL  117
          WT RI + C+WK          G P AS GS  +KV+
Sbjct  413  WTARIWEQCAWKFSRPCRDAGETPEAS-GSYSDYEKVV  449

```

Query= 56

Length=134

| Sequences producing significant alignments:                | Score<br>(Bits) | E<br>Value |
|------------------------------------------------------------|-----------------|------------|
| sp Q29293.1 RL3_PIG RecName: Full=60S ribosomal protein L3 | 27.3            | 4.0        |

#### ALIGNMENTS

```

>sp|Q29293.1|RL3_PIG RecName: Full=60S ribosomal protein L3
Length=130

```

Score = 27.3 bits (59), Expect = 4.0, Method: Compositional matrix adjust.  
 Identities = 9/23 (39%), Positives = 15/23 (65%), Gaps = 0/23 (0%)  
 Frame = +3

```

Query  33  LEDSAVNRMGRFESYGESSGEYA  101
          L D ++N +GRF  YGE + ++
Sbjct  106  LSDKSINPLGRFVHYGEVTNDFV  128

```

Query= 57

Length=122

| Sequences producing significant alignments:                | Score<br>(Bits) | E<br>Value |
|------------------------------------------------------------|-----------------|------------|
| sp Q29293.1 RL3_PIG RecName: Full=60S ribosomal protein L3 | 26.2            | 7.5        |

#### ALIGNMENTS

```

>sp|Q29293.1|RL3_PIG RecName: Full=60S ribosomal protein L3
Length=130

```

Score = 26.2 bits (56), Expect = 7.5, Method: Composition-based stats.  
 Identities = 10/18 (56%), Positives = 13/18 (72%), Gaps = 0/18 (0%)  
 Frame = +3

```

Query  33  LEDSAVNRMGRFESYGEV  86

```

L D ++N +GRF YGEV  
Sbjct 106 LSDKSINPLGRFVHYGEV 123

Query= 58

Length=124

|                                             | Score  | E     |
|---------------------------------------------|--------|-------|
| Sequences producing significant alignments: | (Bits) | Value |

|                                                                  |      |     |
|------------------------------------------------------------------|------|-----|
| sp B3PIT8.1 MNMG_CELJU RecName: Full=tRNA uridine 5-carboxyme... | 27.3 | 6.1 |
|------------------------------------------------------------------|------|-----|

#### ALIGNMENTS

>sp|B3PIT8.1|MNMG\_CELJU RecName: Full=tRNA uridine 5-carboxymethylaminomethyl  
modification  
enzyme MnmG; AltName: Full=Glucose-inhibited division  
protein A  
Length=638

Score = 27.3 bits (59), Expect = 6.1, Method: Composition-based stats.  
Identities = 12/20 (60%), Positives = 15/20 (75%), Gaps = 0/20 (0%)  
Frame = +2

Query 56 SLKGEPSSGEYACPQVRVES 115  
          SLKGEP +GE A QV +E+  
Sbjct 525 SLKGEPLAGEAAAEQVEIEA 544

Query= 59

Length=119

|                                             | Score  | E     |
|---------------------------------------------|--------|-------|
| Sequences producing significant alignments: | (Bits) | Value |

|                                                                  |      |     |
|------------------------------------------------------------------|------|-----|
| sp B1KDM8.1 PYRD_SHEWM RecName: Full=Dihydroorotate dehydroge... | 27.7 | 3.3 |
|------------------------------------------------------------------|------|-----|

#### ALIGNMENTS

>sp|B1KDM8.1|PYRD\_SHEWM RecName: Full=Dihydroorotate dehydrogenase (quinone);  
AltName:  
Full=DHODEhase; Short=DHOD; Short=DHODase; AltName: Full=Dihydroorotate  
oxidase  
Length=340

Score = 27.7 bits (60), Expect = 3.3, Method: Composition-based stats.  
Identities = 10/19 (53%), Positives = 13/19 (68%), Gaps = 0/19 (0%)  
Frame = -2

Query 76 SGFTLQGPSAVRDVILNCR 20  
          SGF QGP ++D+I CR  
Sbjct 319 SGFIYQGPKLIKDIIEACR 337

Query= 60

Length=124

|                                             | Score  | E     |
|---------------------------------------------|--------|-------|
| Sequences producing significant alignments: | (Bits) | Value |

|                        |                                           |      |     |
|------------------------|-------------------------------------------|------|-----|
| sp B1ZGG2.1 MNMG_METPB | RecName: Full=tRNA uridine 5-carboxyme... | 28.1 | 3.8 |
| sp Q8Y003.1 RGMG_RALSO | RecName: Full=Putative ribose/galactos... | 26.9 | 8.2 |

#### ALIGNMENTS

>sp|B1ZGG2.1|MNMG\_METPB RecName: Full=tRNA uridine 5-carboxymethylaminomethyl modification  
enzyme MnmG; AltName: Full=Glucose-inhibited division  
protein A  
Length=624

Score = 28.1 bits (61), Expect = 3.8, Method: Compositional matrix adjust.  
Identities = 16/40 (40%), Positives = 24/40 (60%), Gaps = 3/40 (8%)  
Frame = +1

```
Query   7      TERIPDRVQEN---TPVRRSGLSPSGPR*VQT*LAKVVRF   117
      T+R+ D ++EN   +P+   G+S  GPR   +   KVVRF
Sbjct  248  TQRVHDLIRENLHRSPMYSGGISSRGPRYCPSIEDKVVRF   287
```

>sp|Q8Y003.1|RGMG\_RALSO RecName: Full=Putative ribose/galactose/methyl galactoside import  
ATP-binding protein  
Length=518

Score = 26.9 bits (58), Expect = 8.2, Method: Compositional matrix adjust.  
Identities = 11/29 (38%), Positives = 16/29 (55%), Gaps = 0/29 (0%)  
Frame = -1

```
Query   106  PWQVMSELIWVRDSTRTCGQAYSPELCR   20
      P+  ++E IW+RR+   CG      EL R
Sbjct  116  PYMTVAENIWIWIRREPRNRCGLVDHAELRR   144
```

Query= 61

Length=116

|                                             | Score  | E     |
|---------------------------------------------|--------|-------|
| Sequences producing significant alignments: | (Bits) | Value |

|                        |                                           |      |     |
|------------------------|-------------------------------------------|------|-----|
| sp P16084.1 BGLS_BUTFI | RecName: Full=Beta-glucosidase A; AltN... | 28.1 | 3.0 |
|------------------------|-------------------------------------------|------|-----|

#### ALIGNMENTS

>sp|P16084.1|BGLS\_BUTFI RecName: Full=Beta-glucosidase A; AltName: Full=Beta-D-glucoside  
glucohydrolase; AltName: Full=Cellobiase; AltName: Full=Gentiobiase  
Length=830

Score = 28.1 bits (61), Expect = 3.0, Method: Composition-based stats.  
 Identities = 14/30 (47%), Positives = 16/30 (53%), Gaps = 0/30 (0%)  
 Frame = -3

```
Query 102 QCKCRLMSWSGGTQPGPADRRILLNSVGDS 13
          Q LM+W GG + G A RILL V S
Sbjct 227 QISSVLMAWQGGIEGGLAAARILLGKVNPS 256
```

Query= 62

Length=112

| Sequences producing significant alignments:                      | Score<br>(Bits) | E<br>Value |
|------------------------------------------------------------------|-----------------|------------|
| sp P49327.3 FAS_HUMAN RecName: Full=Fatty acid synthase; Incl... | 28.9            | 1.8        |
| sp O27121.1 PGK_METTH RecName: Full=Phosphoglycerate kinase      | 27.7            | 3.7        |

#### ALIGNMENTS

```
>sp|P49327.3|FAS_HUMAN RecName: Full=Fatty acid synthase; Includes: RecName:
Full=[Acyl-carrier-protein]
S-acetyltransferase; Includes: RecName:
Full=[Acyl-carrier-protein] S-malonyltransferase; Includes:
RecName: Full=3-oxoacyl-[acyl-carrier-protein] synthase; Includes:
RecName: Full=3-oxoacyl-[acyl-carrier-protein] reductase;
Includes: RecName: Full=3-hydroxyacyl-[acyl-carrier-protein]
dehydratase; Includes: RecName: Full=Enoyl-[acyl-carrier-protein]
reductase; Includes: RecName: Full=Oleoyl-[acyl-carrier-protein]
hydrolase
Length=2511
```

Score = 28.9 bits (63), Expect = 1.8, Method: Compositional matrix adjust.  
 Identities = 14/34 (41%), Positives = 22/34 (65%), Gaps = 1/34 (3%)  
 Frame = -3

```
Query 110 FTLQGPSAVRDVILNRWLRSIWYGPAHHLSGIRS 9
          +TLQ + V DV+++RWLR G H+SG+ +
Sbjct 1067 YTLQDKAQVADVVSRLRVTVAG-GVHISGLHT 1099
```

```
>sp|O27121.1|PGK_METTH RecName: Full=Phosphoglycerate kinase
Length=411
```

Score = 27.7 bits (60), Expect = 3.7, Method: Compositional matrix adjust.  
 Identities = 13/30 (43%), Positives = 18/30 (60%), Gaps = 4/30 (13%)  
 Frame = -2

```
Query 78 RDPKQMASIHLVRPSPPL----VGDSFSPA 1
          RDP++ A HLVR PL + D+F+ A
Sbjct 134 RDPEEQAETHLVRKLAPLLDYFINDAFAAA 163
```

Query= 63

Length=136

| Sequences producing significant alignments:                    | Score<br>(Bits) | E<br>Value |
|----------------------------------------------------------------|-----------------|------------|
| sp Q0RRP6.1 RS13_FRAAA RecName: Full=30S ribosomal protein S13 | 26.2            | 9.1        |

#### ALIGNMENTS

>sp|Q0RRP6.1|RS13\_FRAAA RecName: Full=30S ribosomal protein S13  
Length=126

Score = 26.2 bits (56), Expect = 9.1, Method: Compositional matrix adjust.  
Identities = 13/40 (33%), Positives = 20/40 (50%), Gaps = 0/40 (0%)  
Frame = +1

|       |    |                                           |     |
|-------|----|-------------------------------------------|-----|
| Query | 7  | GLGRTRWIEAICRSGTRANTGSTPCCSWKIRLLTEWVGSN  | 126 |
|       |    | G+GRTR E + +G +T +I L EW+ +N              |     |
| Sbjct | 24 | GIGRTRSRET LAATGVNPDTRVRDLSEDEIVRLREWIDAN | 63  |

Query= 64

Length=131

| Sequences producing significant alignments:                      | Score<br>(Bits) | E<br>Value |
|------------------------------------------------------------------|-----------------|------------|
| sp A6X1X9.1 PLSX_OCHA4 RecName: Full=Phosphate acyltransferas... | 27.7            | 4.5        |
| sp A5VPV7.1 PLSX_BRUO2 RecName: Full=Phosphate acyltransferas... | 27.3            | 5.5        |
| sp Q57DX5.1 PLSX_BRUAB RecName: Full=Phosphate acyltransferas... | 27.3            | 5.5        |
| sp Q8YGH8.1 PLSX_BRUME RecName: Full=Phosphate acyltransferas... | 27.3            | 5.5        |
| sp Q8G1E1.1 PLSX_BRUSU RecName: Full=Phosphate acyltransferas... | 27.3            | 5.5        |

#### ALIGNMENTS

>sp|A6X1X9.1|PLSX\_OCHA4 RecName: Full=Phosphate acyltransferase; AltName:  
Full=Acyl-ACP  
phosphotransacylase; AltName: Full=Acyl-[acyl-carrier-protein]--phosphate  
acyltransferase; AltName: Full=Phosphate-acyl-ACP  
acyltransferase  
Length=352

Score = 27.7 bits (60), Expect = 4.5, Method: Composition-based stats.  
Identities = 14/29 (48%), Positives = 18/29 (62%), Gaps = 0/29 (0%)  
Frame = -1

|       |     |                                 |    |
|-------|-----|---------------------------------|----|
| Query | 116 | NPDLRTGVFS*TQGVEPV LARVPERQMAS  | 30 |
|       |     | +PD+R F VEPVLAR P+ + AS         |    |
| Sbjct | 29  | HPDIRFIFFG LPAQVEPV LARYPKLKAAS | 57 |

>sp|A5VPV7.1|PLSX\_BRUO2 RecName: Full=Phosphate acyltransferase; AltName:  
Full=Acyl-ACP  
phosphotransacylase; AltName: Full=Acyl-[acyl-carrier-protein]--phosphate  
acyltransferase; AltName: Full=Phosphate-acyl-ACP  
acyltransferase  
Length=346

Score = 27.3 bits (59), Expect = 5.5, Method: Composition-based stats.  
Identities = 14/29 (48%), Positives = 18/29 (62%), Gaps = 0/29 (0%)  
Frame = -1

```
Query 116 NPDRLRTGVFS*TQGVEPVRLARVPERQMAS 30
          +PD+R F VEPVLAR P+ + AS
Sbjct 29 HPDIRFIFFGLPAQVEPVRLARYPKLKEAS 57
```

```
>sp|Q57DX5.1|PLSX_BRUAB RecName: Full=Phosphate acyltransferase; AltName:
Full=Acyl-ACP
phosphotransacylase; AltName: Full=Acyl-[acyl-carrier-protein]--phosphate
acyltransferase; AltName: Full=Phosphate-acyl-ACP
acyltransferase
sp|Q2YNC0.1|PLSX_BRUA2 RecName: Full=Phosphate acyltransferase; AltName:
Full=Acyl-ACP
phosphotransacylase; AltName: Full=Acyl-[acyl-carrier-protein]--phosphate
acyltransferase; AltName: Full=Phosphate-acyl-ACP
acyltransferase
sp|A9MAF5.1|PLSX_BRUC2 RecName: Full=Phosphate acyltransferase; AltName:
Full=Acyl-ACP
phosphotransacylase; AltName: Full=Acyl-[acyl-carrier-protein]--phosphate
acyltransferase; AltName: Full=Phosphate-acyl-ACP
acyltransferase
sp|B0CLA1.1|PLSX_BRUSI RecName: Full=Phosphate acyltransferase; AltName:
Full=Acyl-ACP
phosphotransacylase; AltName: Full=Acyl-[acyl-carrier-protein]--phosphate
acyltransferase; AltName: Full=Phosphate-acyl-ACP
acyltransferase
sp|B2S523.1|PLSX_BRUA1 RecName: Full=Phosphate acyltransferase; AltName:
Full=Acyl-ACP
phosphotransacylase; AltName: Full=Acyl-[acyl-carrier-protein]--phosphate
acyltransferase; AltName: Full=Phosphate-acyl-ACP
acyltransferase
Length=346
```

Score = 27.3 bits (59), Expect = 5.5, Method: Composition-based stats.  
Identities = 14/29 (48%), Positives = 18/29 (62%), Gaps = 0/29 (0%)  
Frame = -1

```
Query 116 NPDRLRTGVFS*TQGVEPVRLARVPERQMAS 30
          +PD+R F VEPVLAR P+ + AS
Sbjct 29 HPDIRFIFFGLPAQVEPVRLARYPKLKEAS 57
```

```
>sp|Q8YGH8.1|PLSX_BRUME RecName: Full=Phosphate acyltransferase; AltName:
Full=Acyl-ACP
phosphotransacylase; AltName: Full=Acyl-[acyl-carrier-protein]--phosphate
acyltransferase; AltName: Full=Phosphate-acyl-ACP
acyltransferase
sp|C0RIB2.1|PLSX_BRUMB RecName: Full=Phosphate acyltransferase; AltName:
Full=Acyl-ACP
phosphotransacylase; AltName: Full=Acyl-[acyl-carrier-protein]--phosphate
acyltransferase; AltName: Full=Phosphate-acyl-ACP
acyltransferase
Length=346
```

Score = 27.3 bits (59), Expect = 5.5, Method: Composition-based stats.  
Identities = 14/29 (48%), Positives = 18/29 (62%), Gaps = 0/29 (0%)  
Frame = -1

```
Query 116 NPDRLRTGVFS*TQGVEPVRLARVPERQMAS 30
          +PD+R F VEPVLAR P+ + AS
Sbjct 29 HPDIRFIFFGLPAQVEPVRLARYPKLKEAS 57
```

```
>sp|Q8G1E1.1|PLSX_BRUSU RecName: Full=Phosphate acyltransferase; AltName:
Full=Acyl-ACP
phosphotransacylase; AltName: Full=Acyl-[acyl-carrier-protein]--phosphate
acyltransferase; AltName: Full=Phosphate-acyl-ACP
acyltransferase
Length=346
```

```
Score = 27.3 bits (59), Expect = 5.5, Method: Composition-based stats.
Identities = 14/29 (48%), Positives = 18/29 (62%), Gaps = 0/29 (0%)
Frame = -1
```

```
Query 116 NPDRLRTGVFS*TQGVEPVLLARVPERQMAS 30
          +PD+R F VEPVLAR P+ + AS
Sbjct 29 HPDIRFIFGLPAQVEPVLLARYPKLKEAS 57
```

Query= 65

Length=126

| Sequences producing significant alignments:                      | Score<br>(Bits) | E<br>Value |
|------------------------------------------------------------------|-----------------|------------|
| sp P78605.1 OTC_TRAHI RecName: Full=Ornithine carbamoyltransf... | 28.1            | 3.6        |
| sp Q4R5T4.1 RNF32_MACFA RecName: Full=RING finger protein 32     | 26.9            | 7.3        |

#### ALIGNMENTS

```
>sp|P78605.1|OTC_TRAHI RecName: Full=Ornithine carbamoyltransferase,
mitochondrial;
AltName: Full=Ornithine transcarbamylase; Short=OTCase; Flags:
Precursor
Length=375
```

```
Score = 28.1 bits (61), Expect = 3.6, Method: Composition-based stats.
Identities = 14/29 (48%), Positives = 16/29 (55%), Gaps = 5/29 (17%)
Frame = +1
```

```
Query 31 EAICRSGTRANTGSTPSDKFRHNLPRSFD 117
          EA+CR G G+ P KF H LPR D
Sbjct 301 EALCREG-----GANPDWKFMHCLPRKQD 324
```

```
>sp|Q4R5T4.1|RNF32_MACFA RecName: Full=RING finger protein 32
Length=362
```

```
Score = 26.9 bits (58), Expect = 7.3, Method: Composition-based stats.
Identities = 12/17 (71%), Positives = 14/17 (82%), Gaps = 0/17 (0%)
Frame = +2
```

```
Query 44 AQELGLIRVRPPQISSD 94
          AQ+LGLI PPQ+SSD
Sbjct 92 AQKLGLIGPPPPQLSSD 108
```

Query= 66

Length=144

|                                             | Score  | E     |
|---------------------------------------------|--------|-------|
| Sequences producing significant alignments: | (Bits) | Value |

|                                                                  |      |     |
|------------------------------------------------------------------|------|-----|
| sp Q0V6M5.1 LCPS_PHANO RecName: Full=Bifunctional lycopene cy... | 27.3 | 6.8 |
|------------------------------------------------------------------|------|-----|

## ALIGNMENTS

>sp|Q0V6M5.1|LCPS\_PHANO RecName: Full=Bifunctional lycopene cyclase/phytoene synthase;

Includes: RecName: Full=Lycopene beta-cyclase; AltName: Full=Lycopene cyclase; Includes: RecName: Full=Phytoene synthase

Length=585

Score = 27.3 bits (59), Expect = 6.8, Method: Compositional matrix adjust.  
Identities = 18/44 (41%), Positives = 23/44 (52%), Gaps = 3/44 (7%)  
Frame = +3

|       |     |                                              |     |
|-------|-----|----------------------------------------------|-----|
| Query | 6   | WAGPYQMDRSHLL*LEDSAVNRMGRFESYGEFRITSLTAEGP*R | 137 |
|       |     | W PY+ DR+ L L+D AV R+ R F + S T GP R         |     |
| Sbjct | 272 | WVSPYKYDRARLAGLQD-AVLRLKR--KSRSFYLASATFPGPLR | 312 |

Query= 67

Length=122

|                                             | Score  | E     |
|---------------------------------------------|--------|-------|
| Sequences producing significant alignments: | (Bits) | Value |

|                                                             |      |     |
|-------------------------------------------------------------|------|-----|
| sp P45694.2 TKT_BACSU RecName: Full=Transketolase; Short=TK | 28.5 | 2.8 |
|-------------------------------------------------------------|------|-----|

## ALIGNMENTS

>sp|P45694.2|TKT\_BACSU RecName: Full=Transketolase; Short=TK

Length=667

Score = 28.5 bits (62), Expect = 2.8, Method: Composition-based stats.  
Identities = 13/36 (36%), Positives = 22/36 (61%), Gaps = 1/36 (3%)  
Frame = -1

|       |     |                                      |     |
|-------|-----|--------------------------------------|-----|
| Query | 113 | FVQSSLAVGFE-PTHSVNSRIFQLQQMASIHLVRPS | 9   |
|       |     | F S+AVG + PTH ++ L+ M ++ L+RP+       |     |
| Sbjct | 459 | FTHDSIavgEDGPTHEPVEQLASLRAMPNLSLIRPA | 494 |

Query= 68

Length=136

|                                             | Score  | E     |
|---------------------------------------------|--------|-------|
| Sequences producing significant alignments: | (Bits) | Value |

|                                                                  |      |     |
|------------------------------------------------------------------|------|-----|
| sp Q47N76.1 SYFB_THEFY RecName: Full=Phenylalanine--tRNA liga... | 28.5 | 2.9 |
|------------------------------------------------------------------|------|-----|

## ALIGNMENTS

>sp|Q47N76.1|SYFB\_THEFY RecName: Full=Phenylalanine--tRNA ligase beta subunit;  
AltName:

Full=Phenylalanyl-tRNA synthetase beta subunit; Short=PheRS



Length=831

Score = 28.5 bits (62), Expect = 2.9, Method: Composition-based stats.  
Identities = 15/33 (45%), Positives = 20/33 (61%), Gaps = 1/33 (3%)  
Frame = +1

Query 34 AICCSWKIRLLTEWVGSNPTAKLMRRHLH-CGV 129  
AIC + +R +T + + PT MRR LH CGV  
Sbjct 220 AICSRVLRGVTGFDPAAPTPLWMRRRLHLCGV 252

Query= 69

Length=126

|                                                                  | Score  | E     |
|------------------------------------------------------------------|--------|-------|
| Sequences producing significant alignments:                      | (Bits) | Value |
| sp P49327.3 FAS_HUMAN RecName: Full=Fatty acid synthase; Incl... | 29.6   | 1.2   |

#### ALIGNMENTS

>sp|P49327.3|FAS\_HUMAN RecName: Full=Fatty acid synthase; Includes: RecName:  
Full=[Acyl-carrier-protein]  
S-acetyltransferase; Includes: RecName:  
Full=[Acyl-carrier-protein] S-malonyltransferase; Includes:  
RecName: Full=3-oxoacyl-[acyl-carrier-protein] synthase; Includes:  
RecName: Full=3-oxoacyl-[acyl-carrier-protein] reductase;  
Includes: RecName: Full=3-hydroxyacyl-[acyl-carrier-protein]  
dehydratase; Includes: RecName: Full=Enoyl-[acyl-carrier-protein]  
reductase; Includes: RecName: Full=Oleoyl-[acyl-carrier-protein]  
hydrolase  
Length=2511

Score = 29.6 bits (65), Expect = 1.2, Method: Compositional matrix adjust.  
Identities = 12/30 (40%), Positives = 19/30 (63%), Gaps = 0/30 (0%)  
Frame = -3

Query 94 ERRFTLQGPSAVRDVILNRWLRSIWYGAH 5  
++ +TLQ + V DV+++RWLR G H  
Sbjct 1064 QKLYTLQDKAQVADVVSRLRVTVAGGVH 1093

Query= 70

Length=144

|                                                                  | Score  | E     |
|------------------------------------------------------------------|--------|-------|
| Sequences producing significant alignments:                      | (Bits) | Value |
| sp P49327.3 FAS_HUMAN RecName: Full=Fatty acid synthase; Incl... | 28.9   | 2.6   |

#### ALIGNMENTS

>sp|P49327.3|FAS\_HUMAN RecName: Full=Fatty acid synthase; Includes: RecName:  
Full=[Acyl-carrier-protein]  
S-acetyltransferase; Includes: RecName:  
Full=[Acyl-carrier-protein] S-malonyltransferase; Includes:  
RecName: Full=3-oxoacyl-[acyl-carrier-protein] synthase; Includes:  
RecName: Full=3-oxoacyl-[acyl-carrier-protein] reductase;  
Includes: RecName: Full=3-hydroxyacyl-[acyl-carrier-protein]  
dehydratase; Includes: RecName: Full=Enoyl-[acyl-carrier-protein]  
reductase; Includes: RecName: Full=Oleoyl-[acyl-carrier-protein]

Query= 71

Length=139

|                                                                  | Score  | E     |
|------------------------------------------------------------------|--------|-------|
| Sequences producing significant alignments:                      | (Bits) | Value |
| sp P49327.3 FAS_HUMAN RecName: Full=Fatty acid synthase; Incl... | 28.5   | 2.9   |
| sp B3PIT8.1 MNMG_CELJU RecName: Full=tRNA uridine 5-carboxyme... | 27.3   | 6.7   |

## ALIGNMENTS

```
>sp|P49327.3|FAS_HUMAN RecName: Full=Fatty acid synthase; Includes: RecName:
Full=[Acyl-carrier-protein]
S-acetyltransferase; Includes: RecName:
Full=[Acyl-carrier-protein] S-malonyltransferase; Includes:
RecName: Full=3-oxoacyl-[acyl-carrier-protein] synthase; Includes:
RecName: Full=3-oxoacyl-[acyl-carrier-protein] reductase;
Includes: RecName: Full=3-hydroxyacyl-[acyl-carrier-protein]
dehydratase; Includes: RecName: Full=Enoyl-[acyl-carrier-protein]
reductase; Includes: RecName: Full=Oleoyle-[acyl-carrier-protein]
hydrolase
Length=2511
```

Score = 28.5 bits (62), Expect = 2.9, Method: Compositional matrix adjust.  
 Identities = 12/27 (44%), Positives = 17/27 (63%), Gaps = 0/27 (0%)  
 Frame = -1

```
Query 85 FTLQGPSAVRDVILNRWLR SIWYGPAH 5
      +TLQ + V DV+++RWLR G H
Sbjct 1067 YTLQDKAQVADV VVSRWLRVTVAGGVH 1093
```

```
>sp|B3PIT8.1|MNMG_CELJU RecName: Full=tRNA uridine 5-carboxymethylaminomethyl
modification
enzyme MnmG; AltName: Full=Glucose-inhibited division
protein A
Length=638
```

Score = 27.3 bits (59), Expect = 6.7, Method: Composition-based stats.  
 Identities = 12/20 (60%), Positives = 15/20 (75%), Gaps = 0/20 (0%)  
 Frame = +2

```
Query 71 SLKGEPSSGEYAC PQVRVES 130
      SLKGEP +GE A QV +E+
Sbjct 525 SLKGEP LAGEAAA EQVEIEA 544
```

Query= 72

Length=134

|                                                                  | Score  | E     |
|------------------------------------------------------------------|--------|-------|
| Sequences producing significant alignments:                      | (Bits) | Value |
| sp P49327.3 FAS_HUMAN RecName: Full=Fatty acid synthase; Incl... | 29.3   | 1.8   |

## ALIGNMENTS

```
>sp|P49327.3|FAS_HUMAN RecName: Full=Fatty acid synthase; Includes: RecName:
Full=[Acyl-carrier-protein]
S-acetyltransferase; Includes: RecName:
Full=[Acyl-carrier-protein] S-malonyltransferase; Includes:
RecName: Full=3-oxoacyl-[acyl-carrier-protein] synthase; Includes:
```

RecName: Full=3-oxoacyl-[acyl-carrier-protein] reductase;  
 Includes: RecName: Full=3-hydroxyacyl-[acyl-carrier-protein]  
 dehydratase; Includes: RecName: Full=Enoyl-[acyl-carrier-protein]  
 reductase; Includes: RecName: Full=Oleoyl-[acyl-carrier-protein]  
 hydrolase  
 Length=2511

Score = 29.3 bits (64), Expect = 1.8, Method: Compositional matrix adjust.  
 Identities = 12/27 (44%), Positives = 17/27 (63%), Gaps = 0/27 (0%)  
 Frame = -2

Query 85 FTLQGSAVRDVILNRWLR SIWYGPAH 5  
 +TLQ + V DV+++RWLR G H  
 Sbjct 1067 YTLQDKAQVADV VVSRWLRVTVAGGVH 1093

Query= 73

Length=112

|                                             |                                            | Score  | E     |
|---------------------------------------------|--------------------------------------------|--------|-------|
|                                             |                                            | (Bits) | Value |
| Sequences producing significant alignments: |                                            |        |       |
| sp P49327.3 FAS_HUMAN                       | RecName: Full=Fatty acid synthase; Incl... | 28.5   | 2.5   |

#### ALIGNMENTS

>sp|P49327.3|FAS\_HUMAN RecName: Full=Fatty acid synthase; Includes: RecName:  
 Full=[Acyl-carrier-protein]  
 S-acetyltransferase; Includes: RecName:  
 Full=[Acyl-carrier-protein] S-malonyltransferase; Includes:  
 RecName: Full=3-oxoacyl-[acyl-carrier-protein] synthase; Includes:  
 RecName: Full=3-oxoacyl-[acyl-carrier-protein] reductase;  
 Includes: RecName: Full=3-hydroxyacyl-[acyl-carrier-protein]  
 dehydratase; Includes: RecName: Full=Enoyl-[acyl-carrier-protein]  
 reductase; Includes: RecName: Full=Oleoyl-[acyl-carrier-protein]  
 hydrolase  
 Length=2511

Score = 28.5 bits (62), Expect = 2.5, Method: Compositional matrix adjust.  
 Identities = 12/27 (44%), Positives = 17/27 (63%), Gaps = 0/27 (0%)  
 Frame = -1

Query 85 FTLQGSAVRDVILNRWLR SIWYGPAH 5  
 +TLQ + V DV+++RWLR G H  
 Sbjct 1067 YTLQDKAQVADV VVSRWLRVTVAGGVH 1093

Query= 74

Length=126

|                                             |                                            | Score  | E     |
|---------------------------------------------|--------------------------------------------|--------|-------|
|                                             |                                            | (Bits) | Value |
| Sequences producing significant alignments: |                                            |        |       |
| sp P49327.3 FAS_HUMAN                       | RecName: Full=Fatty acid synthase; Incl... | 28.9   | 2.4   |

#### ALIGNMENTS

>sp|P49327.3|FAS\_HUMAN RecName: Full=Fatty acid synthase; Includes: RecName:  
 Full=[Acyl-carrier-protein]  
 S-acetyltransferase; Includes: RecName:  
 Full=[Acyl-carrier-protein] S-malonyltransferase; Includes:  
 RecName: Full=3-oxoacyl-[acyl-carrier-protein] synthase; Includes:

RecName: Full=3-oxoacyl-[acyl-carrier-protein] reductase;  
 Includes: RecName: Full=3-hydroxyacyl-[acyl-carrier-protein]  
 dehydratase; Includes: RecName: Full=Enoyl-[acyl-carrier-protein]  
 reductase; Includes: RecName: Full=Oleoyl-[acyl-carrier-protein]  
 hydrolase  
 Length=2511

Score = 28.9 bits (63), Expect = 2.4, Method: Compositional matrix adjust.  
 Identities = 12/27 (44%), Positives = 17/27 (63%), Gaps = 0/27 (0%)  
 Frame = -3

Query 85 FTLQGPSAVRDVILNRWLRSIWYGPAH 5  
 +TLQ + V DV+++RWLR G H  
 Sbjct 1067 YTLQDKAQVADVVSRLRVTVAGGVH 1093

Query= 75

Length=139

| Sequences producing significant alignments: |                                           |  | Score  | E     |
|---------------------------------------------|-------------------------------------------|--|--------|-------|
|                                             |                                           |  | (Bits) | Value |
| sp Q9BI06.1 R27A1_ENTHI                     | RecName: Full=60S ribosomal protein L...  |  | 31.2   | 0.17  |
| sp Q9BH80.1 R27A2_ENTHI                     | RecName: Full=60S ribosomal protein L...  |  | 30.8   | 0.27  |
| sp Q9BI14.1 R27A3_ENTHI                     | RecName: Full=60S ribosomal protein L...  |  | 30.0   | 0.55  |
| sp Q8Y003.1 RGMG_RALSO                      | RecName: Full=Putative ribose/galactos... |  | 26.9   | 8.2   |

#### ALIGNMENTS

>sp|Q9BI06.1|R27A1\_ENTHI RecName: Full=60S ribosomal protein L27a-1  
 Length=149

Score = 31.2 bits (69), Expect = 0.17, Method: Composition-based stats.  
 Identities = 13/41 (32%), Positives = 23/41 (56%), Gaps = 0/41 (0%)  
 Frame = +3

Query 12 GPYQMDRSHLSSGEYACPQVRVESLRTQISSDITCQGRSIR 134  
 G + M HL + +Y CP + V+SL + + DI Q ++ +  
 Sbjct 54 GKHGMRVFHLKANKYYCPSINVDSLWLVGKDIQAQYKNAK 94

>sp|Q9BH80.1|R27A2\_ENTHI RecName: Full=60S ribosomal protein L27a-2/4  
 Length=149

Score = 30.8 bits (68), Expect = 0.27, Method: Composition-based stats.  
 Identities = 12/41 (29%), Positives = 23/41 (56%), Gaps = 0/41 (0%)  
 Frame = +3

Query 12 GPYQMDRSHLSSGEYACPQVRVESLRTQISSDITCQGRSIR 134  
 G + M HL + +Y CP + V+SL + + D+ Q ++ +  
 Sbjct 54 GKHGMRVFHLKANKYYCPSINVDSLWLVGKDVQAQYKNAK 94

>sp|Q9BI14.1|R27A3\_ENTHI RecName: Full=60S ribosomal protein L27a-3  
 Length=149

Score = 30.0 bits (66), Expect = 0.55, Method: Composition-based stats.  
 Identities = 12/42 (29%), Positives = 24/42 (57%), Gaps = 0/42 (0%)  
 Frame = +3

Query 12 GPYQMDRSHLSSGEYACPQVRVESLRTQISSDITCQGRSIRS 137  
 G + M HL + +Y CP + V+SL + + D+ Q ++ ++

Sbjct 54 GKHGMRVFHLKANKYYCPSINVDSLWSLVGKDVQEYKNAKT 95

>sp|Q8Y003.1|RGMG\_RALSO RecName: Full=Putative ribose/galactose/methyl  
galactoside import  
ATP-binding protein  
Length=518

Score = 26.9 bits (58), Expect = 8.2, Method: Compositional matrix adjust.  
Identities = 11/28 (39%), Positives = 16/28 (57%), Gaps = 0/28 (0%)  
Frame = -1

Query 121 PWQVMSELIWVRDSTRTCGQAYSPELR 38  
P+ ++E IW+RR+ CG ELR  
Sbjct 116 PYMTVAENIWIRREPRNRCGLVDHAELR 143

Query= 76

Length=131

| Sequences producing significant alignments:                      | Score<br>(Bits) | E<br>Value |
|------------------------------------------------------------------|-----------------|------------|
| sp P16084.1 BGLS_BUTFI RecName: Full=Beta-glucosidase A; AltN... | 28.1            | 3.9        |

#### ALIGNMENTS

>sp|P16084.1|BGLS\_BUTFI RecName: Full=Beta-glucosidase A; AltName: Full=Beta-D-  
glucoside  
glucohydrolase; AltName: Full=Cellobiase; AltName: Full=Gentiobiase  
Length=830

Score = 28.1 bits (61), Expect = 3.9, Method: Composition-based stats.  
Identities = 16/38 (42%), Positives = 19/38 (50%), Gaps = 2/38 (5%)  
Frame = -3

Query 117 QCKCRMSWSGGTQPGPADRRILLNSDGFDPSTGTAQPT 4  
Q LM+W GG + G A RILL +PSG T  
Sbjct 227 QISSVLMAWQGGIEGGLAAARILLGK--VNPSGKLSDT 262

Query= 77

Length=104

|                                             | Score  | E     |
|---------------------------------------------|--------|-------|
| Sequences producing significant alignments: | (Bits) | Value |

|                                                                  |      |     |
|------------------------------------------------------------------|------|-----|
| sp Q0V6M5.1 LCPS_PHANO RecName: Full=Bifunctional lycopene cy... | 26.9 | 7.7 |
|------------------------------------------------------------------|------|-----|

## ALIGNMENTS

>sp|Q0V6M5.1|LCPS\_PHANO RecName: Full=Bifunctional lycopene cyclase/phytoene synthase;

Includes: RecName: Full=Lycopene beta-cyclase; AltName: Full=Lycopene cyclase; Includes: RecName: Full=Phytoene synthase  
Length=585

Score = 26.9 bits (58), Expect = 7.7, Method: Compositional matrix adjust.  
Identities = 9/18 (50%), Positives = 13/18 (72%), Gaps = 0/18 (0%)  
Frame = +3

|       |     |                    |     |
|-------|-----|--------------------|-----|
| Query | 6   | WAGPYQMDRSHLAGLNES | 59  |
|       |     | W PY+ DR+ LAGL ++  |     |
| Sbjct | 272 | WVSPYKYDRARLAGLQDA | 289 |

Query= 78

Length=117

|                                             | Score  | E     |
|---------------------------------------------|--------|-------|
| Sequences producing significant alignments: | (Bits) | Value |

|                                                                  |      |     |
|------------------------------------------------------------------|------|-----|
| sp Q0V6M5.1 LCPS_PHANO RecName: Full=Bifunctional lycopene cy... | 28.5 | 2.1 |
| sp P35341.1 L_SV41 RecName: Full=RNA-directed RNA polymerase ... | 28.5 | 2.3 |

## ALIGNMENTS

>sp|Q0V6M5.1|LCPS\_PHANO RecName: Full=Bifunctional lycopene cyclase/phytoene synthase;

Includes: RecName: Full=Lycopene beta-cyclase; AltName: Full=Lycopene cyclase; Includes: RecName: Full=Phytoene synthase  
Length=585

Score = 28.5 bits (62), Expect = 2.1, Method: Compositional matrix adjust.  
Identities = 10/24 (42%), Positives = 15/24 (63%), Gaps = 0/24 (0%)  
Frame = +3

|       |     |                           |     |
|-------|-----|---------------------------|-----|
| Query | 6   | WAGPYQMDRSHLAGLNESPTFRR   | 77  |
|       |     | W PY+ DR+ LAGL ++ +R      |     |
| Sbjct | 272 | WVSPYKYDRARLAGLQDAVLR LKR | 295 |

>sp|P35341.1|L\_SV41 RecName: Full=RNA-directed RNA polymerase L; Short=Protein L;

AltName: Full=Large structural protein; AltName: Full=Replicase;  
AltName: Full=Transcriptase; Includes: RecName: Full=RNA-directed RNA polymerase; Includes: RecName: Full=mRNA (guanine-N(7)-)-methyltransferase; Includes: RecName: Full=mRNA guanylyltransferase  
Length=2269

Score = 28.5 bits (62), Expect = 2.3, Method: Composition-based stats.

Identities = 14/30 (47%), Positives = 19/30 (63%), Gaps = 1/30 (3%)  
 Frame = -3

Query 100 PGPADDRILLNSVGD-SFSPARWLRSIWG 14  
 P P +RR+LLN + D SF PA+ L + G  
 Sbjct 509 PNPFNRRLLLLNFIEDPSFDPAKELEYVTSG 538

Query= 79

Length=104

|                                                                  | Score  | E     |
|------------------------------------------------------------------|--------|-------|
| Sequences producing significant alignments:                      | (Bits) | Value |
| sp Q0V6M5.1 LCPS_PHANO RecName: Full=Bifunctional lycopene cy... | 26.6   | 9.1   |

#### ALIGNMENTS

>sp|Q0V6M5.1|LCPS\_PHANO RecName: Full=Bifunctional lycopene cyclase/phytoene synthase;  
 Includes: RecName: Full=Lycopene beta-cyclase; AltName: Full=Lycopene cyclase; Includes: RecName: Full=Phytoene synthase  
 Length=585

Score = 26.6 bits (57), Expect = 9.1, Method: Composition-based stats.  
 Identities = 9/18 (50%), Positives = 13/18 (72%), Gaps = 0/18 (0%)  
 Frame = +3

Query 6 WAGPYQMDRSHLAGLNES 59  
 W PY+ DR+ LAGL ++  
 Sbjct 272 WVSPYKYDRARLAGLQDA 289

Query= 80

Length=126

|                                                                  | Score  | E     |
|------------------------------------------------------------------|--------|-------|
| Sequences producing significant alignments:                      | (Bits) | Value |
| sp Q6XQH7.2 L_OLVVA RecName: Full=RNA-directed RNA polymerase... | 30.8   | 0.56  |

#### ALIGNMENTS

>sp|Q6XQH7.2|L\_OLVVA RecName: Full=RNA-directed RNA polymerase L; Short=Protein L;  
 AltName: Full=Large structural protein; AltName: Full=Replicase;  
 AltName: Full=Transcriptase  
 Length=2234

Score = 30.8 bits (68), Expect = 0.56, Method: Composition-based stats.  
 Identities = 15/34 (44%), Positives = 20/34 (59%), Gaps = 0/34 (0%)  
 Frame = -1

Query 126 AERIERPWQVMSELICSGHSAVQVSSHELDGFDP 25  
 AE ER ++ SE +C V+VS HE+ FDP  
 Sbjct 951 AELQERLSELWSEFMCMKIITVEVSLHEIKDFDP 984

Query= 81

Length=136

|                                             | Score<br>(Bits) | E<br>Value |
|---------------------------------------------|-----------------|------------|
| Sequences producing significant alignments: |                 |            |

|                                                            |      |     |
|------------------------------------------------------------|------|-----|
| sp Q29293.1 RL3_PIG RecName: Full=60S ribosomal protein L3 | 26.6 | 8.4 |
|------------------------------------------------------------|------|-----|

#### ALIGNMENTS

>sp|Q29293.1|RL3\_PIG RecName: Full=60S ribosomal protein L3  
Length=130

Score = 26.6 bits (57), Expect = 8.4, Method: Compositional matrix adjust.  
Identities = 10/19 (53%), Positives = 13/19 (68%), Gaps = 0/19 (0%)  
Frame = +2

|       |     |     |      |      |      |      |     |
|-------|-----|-----|------|------|------|------|-----|
| Query | 47  | LED | SAVN | RMGR | FESY | GEVV | 103 |
|       |     | L   | D    | ++N  | +GRF | YGEV |     |
| Sbjct | 106 | LSD | KSIN | PLGR | FVHY | GEVT | 124 |

Query= 82

Length=138

|                                             | Score<br>(Bits) | E<br>Value |
|---------------------------------------------|-----------------|------------|
| Sequences producing significant alignments: |                 |            |

|                                                                  |      |     |
|------------------------------------------------------------------|------|-----|
| sp B3PIT8.1 MNMG_CELJU RecName: Full=tRNA uridine 5-carboxyme... | 27.3 | 6.7 |
|------------------------------------------------------------------|------|-----|

#### ALIGNMENTS

>sp|B3PIT8.1|MNMG\_CELJU  
RecName: Full=tRNA uridine 5-carboxymethylaminomethyl modification  
enzyme MnmG; AltName: Full=Glucose-inhibited division  
protein A  
Length=638

Score = 27.3 bits (59), Expect = 6.7, Method: Composition-based stats.  
Identities = 12/20 (60%), Positives = 15/20 (75%), Gaps = 0/20 (0%)  
Frame = +1

|       |     |     |     |       |       |     |     |     |
|-------|-----|-----|-----|-------|-------|-----|-----|-----|
| Query | 70  | SLK | GEP | SSGE  | YACP  | QVR | VES | 129 |
|       |     | SLK | GEP | +GE   | A     | QV  | +E+ |     |
| Sbjct | 525 | SLK | GEP | PLAGE | AAAAE | QVE | IEA | 544 |

Query= 83

Length=130

|                                             | Score<br>(Bits) | E<br>Value |
|---------------------------------------------|-----------------|------------|
| Sequences producing significant alignments: |                 |            |

|                                                                  |      |     |
|------------------------------------------------------------------|------|-----|
| sp Q1AW66.1 PYRH_RUBXD RecName: Full=Uridylate kinase; Short=... | 27.3 | 4.7 |
|------------------------------------------------------------------|------|-----|



## ALIGNMENTS

>sp|Q1AW66.1|PYRH\_RUBXD RecName: Full=Uridylate kinase; Short=UK; AltName: Full=Uridine monophosphate kinase; Short=UMP kinase; Short=UMPK  
Length=255

Score = 27.3 bits (59), Expect = 4.7, Method: Composition-based stats.  
Identities = 16/37 (43%), Positives = 20/37 (54%), Gaps = 3/37 (8%)  
Frame = +3

Query 27 GVTARVQENT---PVRRSGLSPSGPPLRNSG\*YGFDP 128  
G +AR E + P+RR L SG L +G YG DP  
Sbjct 2 GESARAAETSELGPLRRVVLKLSGESLAGNGGYGIDP 38

Query= 84

Length=116

| Sequences producing significant alignments:                    | Score<br>(Bits) | E<br>Value |
|----------------------------------------------------------------|-----------------|------------|
| sp A4FPQ7.1 RL10_SACEN RecName: Full=50S ribosomal protein L10 | 27.7            | 3.2        |

## ALIGNMENTS

>sp|A4FPQ7.1|RL10\_SACEN RecName: Full=50S ribosomal protein L10  
Length=177

Score = 27.7 bits (60), Expect = 3.2, Method: Composition-based stats.  
Identities = 16/34 (47%), Positives = 21/34 (62%), Gaps = 1/34 (3%)  
Frame = +3

Query 6 MRRHLHCGVTARVQENTPVRRSGLSPSGPAGLNE 107  
+RR L G T RV +NT V+R+ SG GL+E  
Sbjct 39 LRRALGEGTTYRVAKNTLVKRAA-EQSGVEGLDE 71

Query= 85

Length=103

| Sequences producing significant alignments:                      | Score<br>(Bits) | E<br>Value |
|------------------------------------------------------------------|-----------------|------------|
| sp Q1R0H5.1 RL3_CHRSD RecName: Full=50S ribosomal protein L3     | 26.6            | 5.9        |
| sp B4SKW3.1 RL3_STRM5 RecName: Full=50S ribosomal protein L3 ... | 26.6            | 6.9        |

## ALIGNMENTS

>sp|Q1R0H5.1|RL3\_CHRSD RecName: Full=50S ribosomal protein L3  
Length=212

Score = 26.6 bits (57), Expect = 5.9, Method: Compositional matrix adjust.  
Identities = 10/22 (45%), Positives = 18/22 (82%), Gaps = 0/22 (0%)  
Frame = -3

Query 74 PERLSGIRSVQPSGHSVAVQVSS 9  
P R++ +++V+ G+SAVQV+S  
Sbjct 32 PNRVTRVKTVESDGYSVAVQVTS 53

>sp|B4SKW3.1|RL3\_STRM5 RecName: Full=50S ribosomal protein L3  
 sp|B2FQ45.1|RL3\_STRMK RecName: Full=50S ribosomal protein L3  
 Length=216

Score = 26.6 bits (57), Expect = 6.9, Method: Compositional matrix adjust.  
 Identities = 10/22 (45%), Positives = 17/22 (77%), Gaps = 0/22 (0%)  
 Frame = -3

Query 77 VPERLSGIRSVQPSGHSVQVS 12  
 P R++ I++V+ G+SAVQV+  
 Sbjct 35 TPNRIAQIKTVETDGYSVQVT 56

Query= 86

Length=104

| Sequences producing significant alignments: | Score<br>(Bits) | E<br>Value |
|---------------------------------------------|-----------------|------------|
|---------------------------------------------|-----------------|------------|

|                                                                  |      |     |
|------------------------------------------------------------------|------|-----|
| sp Q5MI53.1 TRPA_LEPBP RecName: Full=Tryptophan synthase alph... | 26.9 | 4.9 |
|------------------------------------------------------------------|------|-----|

#### ALIGNMENTS

>sp|Q5MI53.1|TRPA\_LEPBP RecName: Full=Tryptophan synthase alpha chain  
 sp|B0SDM7.1|TRPA\_LEPBA RecName: Full=Tryptophan synthase alpha chain  
 Length=266

Score = 26.9 bits (58), Expect = 4.9, Method: Composition-based stats.  
 Identities = 11/23 (48%), Positives = 13/23 (57%), Gaps = 0/23 (0%)  
 Frame = +3

Query 21 HCGVTARLD\*TNPRQVVGWAVPD 89  
 HCG+T LD VVG +PD  
 Sbjct 106 HCGITKFLDNAKDSGVVGLVIPD 128

| Lambda | K     | H     |
|--------|-------|-------|
| 0.318  | 0.134 | 0.401 |

Gapped

| Lambda | K      | H     |
|--------|--------|-------|
| 0.267  | 0.0410 | 0.140 |

Matrix: BLOSUM62

Gap Penalties: Existence: 11, Extension: 1

Number of Sequences: 454086

Number of Hits to DB: 13772125358

Number of extensions: 328258447

Number of successful extensions: 452965

Number of sequences better than 10: 744

Number of HSP's better than 10 without gapping: 0

Number of HSP's gapped: 452955

Number of HSP's successfully gapped: 1292

Length of database: 169309753

T: 12

A: 40

X1: 16 (7.3 bits)

X2: 38 (14.6 bits)

X3: 64 (24.7 bits)

S1: 41 (20.4 bits)

ka-blk-alpha gapped: 1.9

ka-blk-alpha ungapped: 0.7916

ka-blk-alpha\_v gapped: 42.6028

ka-blk-alpha\_v ungapped: 4.96466

ka-blk-sigma gapped: 43.6362
