# Supplementary material for: tRNA Core Hypothesis for the Transition from the RNA World to the Ribonucleoprotein World
Source: MDPI journal article supplement (doi:10.3390/life6020015), 2016-03-23
Supplement: s1 [file s1]

# Supplementary Materials: tRNA Core Hypothesis for the Transition from the RNA World to the Ribonucleoprotein World

Savio T. de Farias <sup>1,†,\*</sup>, Thais G. Rêgo <sup>2,†</sup> and Marco V. José <sup>3,†,\*</sup>

Ancestral sequence of cognate tRNAs for:

```
ile = "GCCGCTCAGGAACTCGGGCTAATACGGGTTTCGACCCCCT"  
asn = "CTGTAGCTGGAAGATTTCGGCTGTAAACCGAATGGGTAGGTTCTGAATCCTACGGCGA"  
val = "GTTTAGGATCACGTCCCTAACAGCAGAAGGTCCTTGAAGGGTGAACC"  
asp = "GAGTTCAGGAGAATACGCCTGTCCGCAGGTCGGGGTTGAGTCCCTCCGGACC"  
gly = "CAGATAAGTTCAGACATAACTTGCCAAGGTCGTTTCGATTCGTTCTGC"  
ser = "GGCTGGACTGAACGAATCCCCGACA"  
thr = "AGTGGTGGGCTGGGCCGTACCAGATGGATCGAAGCCATCT"  
ala = "AGCTCATGAGACGACACTTGCACTGCGGAGTGACCGCTA"
```
